# Supplementary material for: Palladium-catalyzed dearomative allylation of indoles with cyclopropyl acetylenes: access to indolenine derivatives
Source: Royal Society of Chemistry journal article supplement (doi:10.1039/d0ob02103b), 2020-12-19

## Supporting Information

### **Palladium-catalyzed dearomative allylation of indoles with cyclopropyl acetylenes: access to indolenine derivatives**

Chuan-Jun Lu,<sup>\*a,b</sup> Yu-Ting Chen,<sup>a</sup> Hong Wang,<sup>a</sup> Yu-Jin Li<sup>a</sup>

**2,3-dimethyl-3-((2E,4E)-5-phenylpenta-2,4-dien-1-yl)-3H-indole (3aa)**

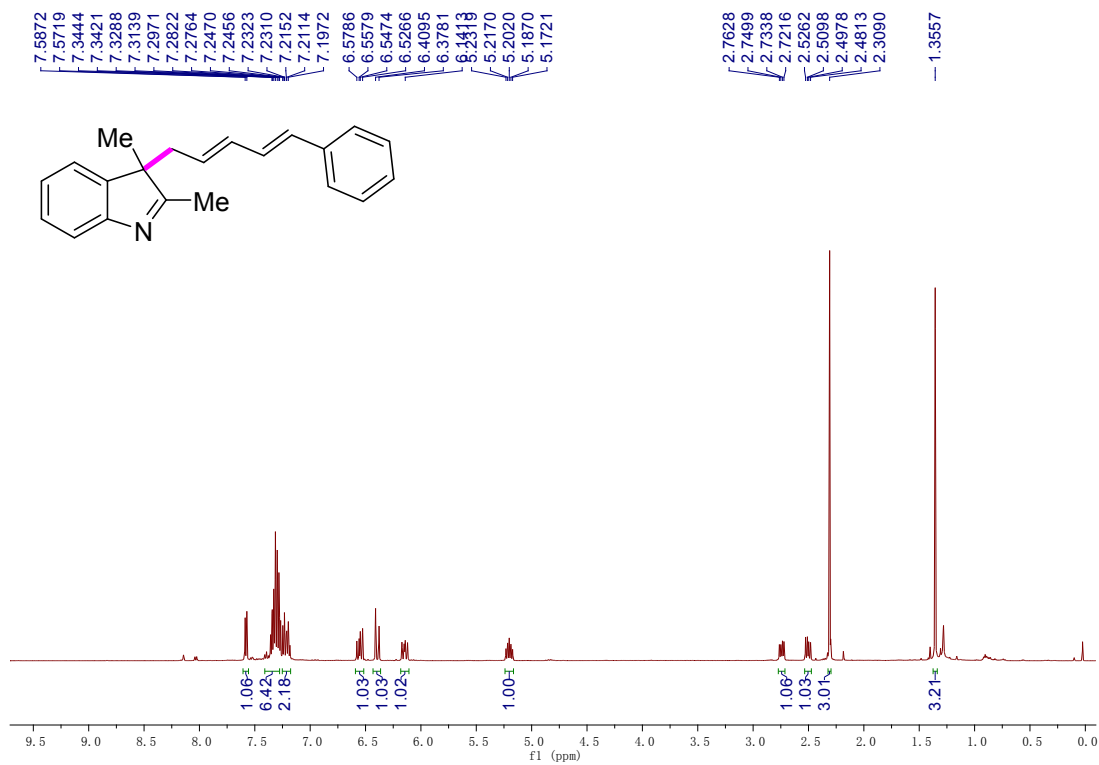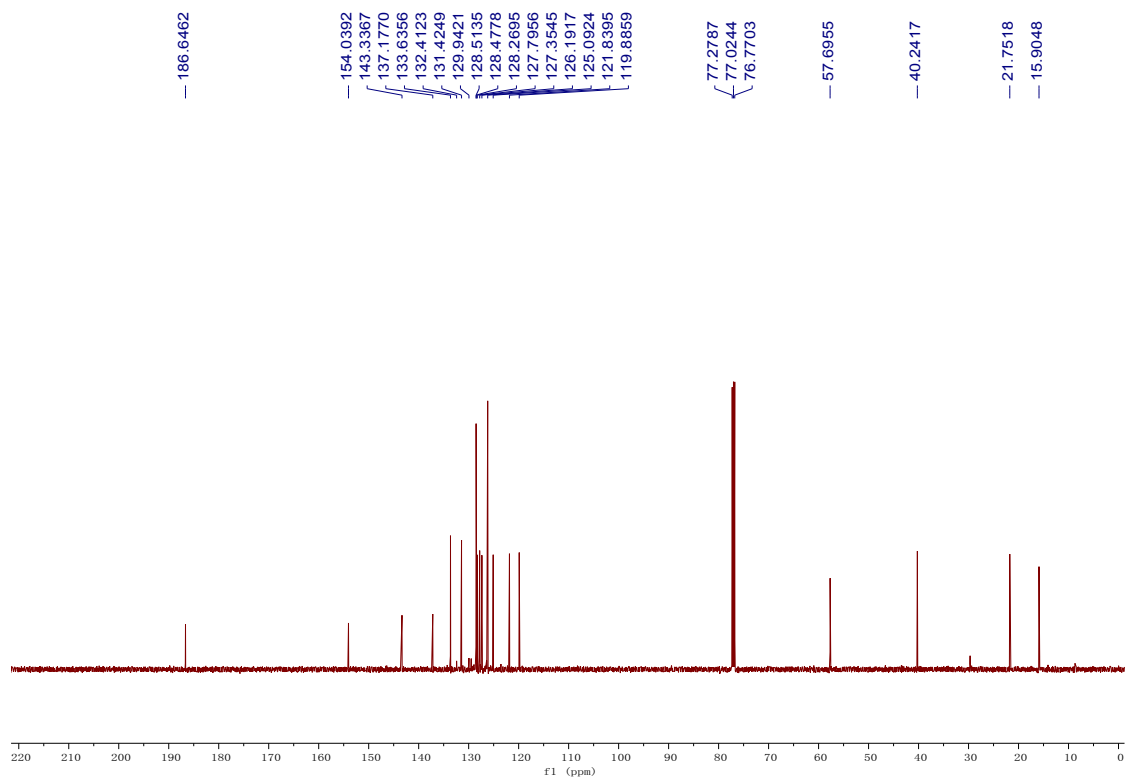

**3-((2E, 4E)-5-(3-fluorophenyl)penta-2,4-dien-1-yl) -2,3-dimethyl-3H-indole (3ab)**

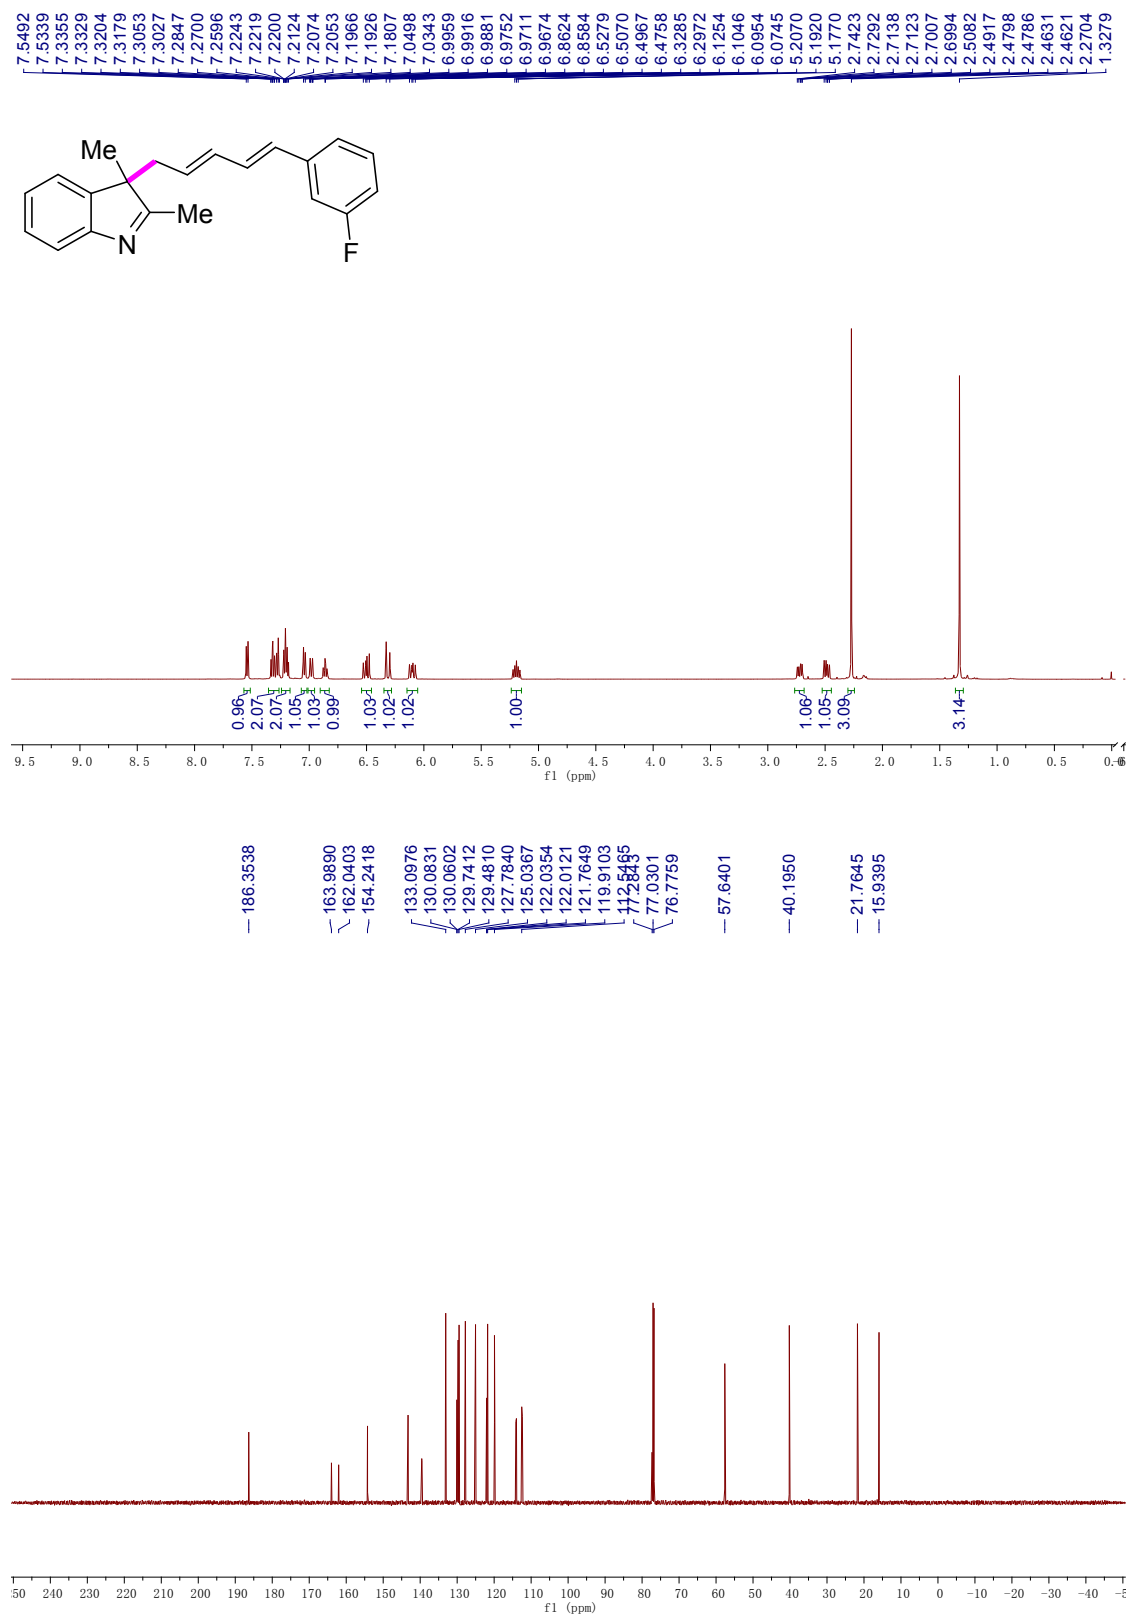

**3-((2E, 4E)-5-(3-chlorophenyl)penta-2,4-dien-1-yl)-2,3-dimethyl-1H-indole (3ac)**

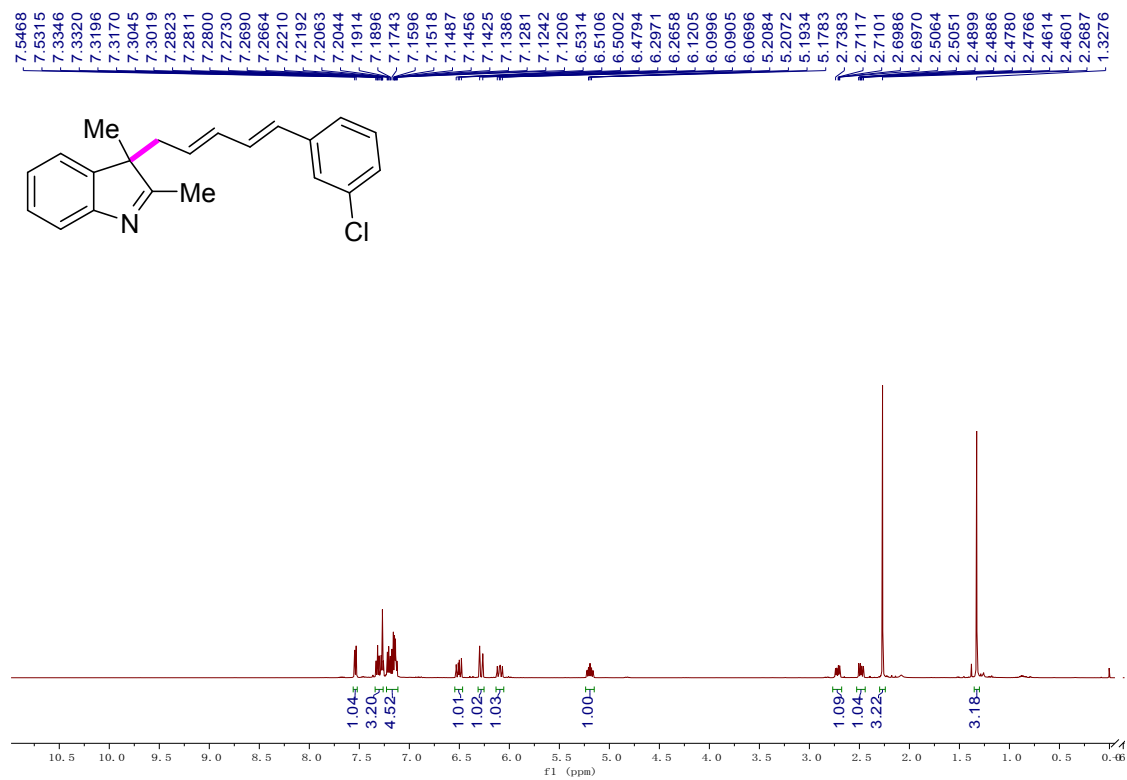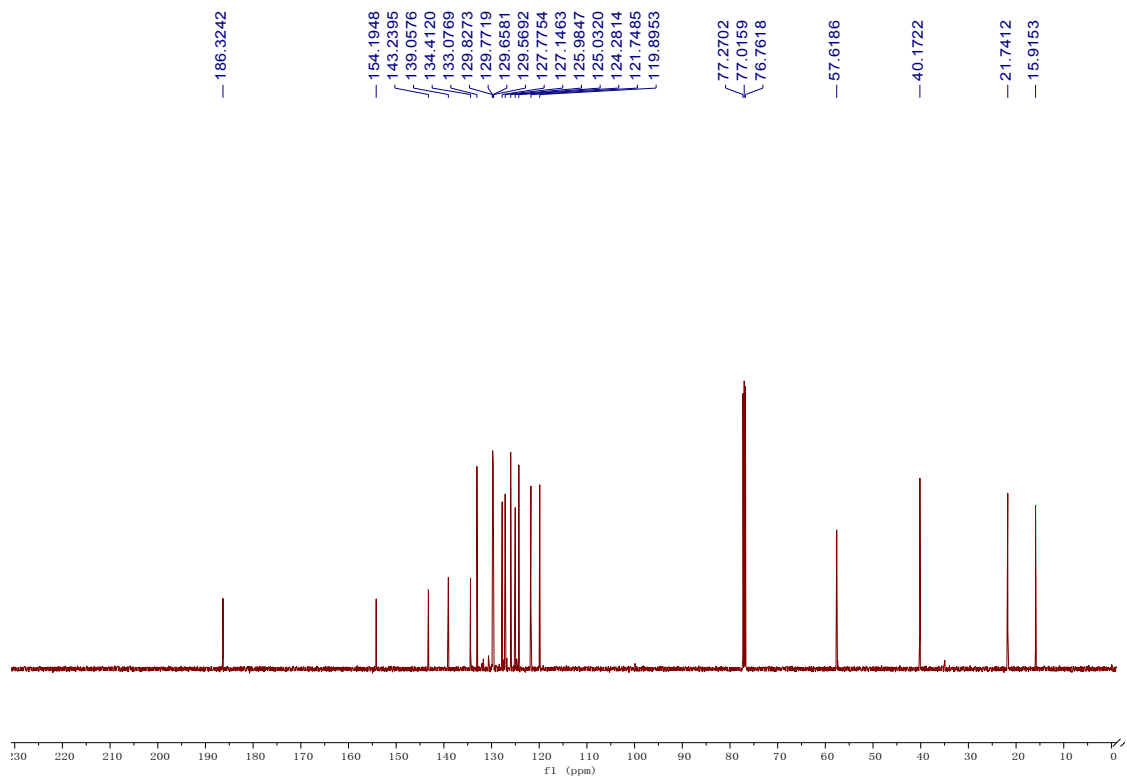

3-((2E, 4E)-5-(4-chlorophenyl)penta-2,4-dien-1-yl)-2,3-dimethyl-1H-indole (3ad)

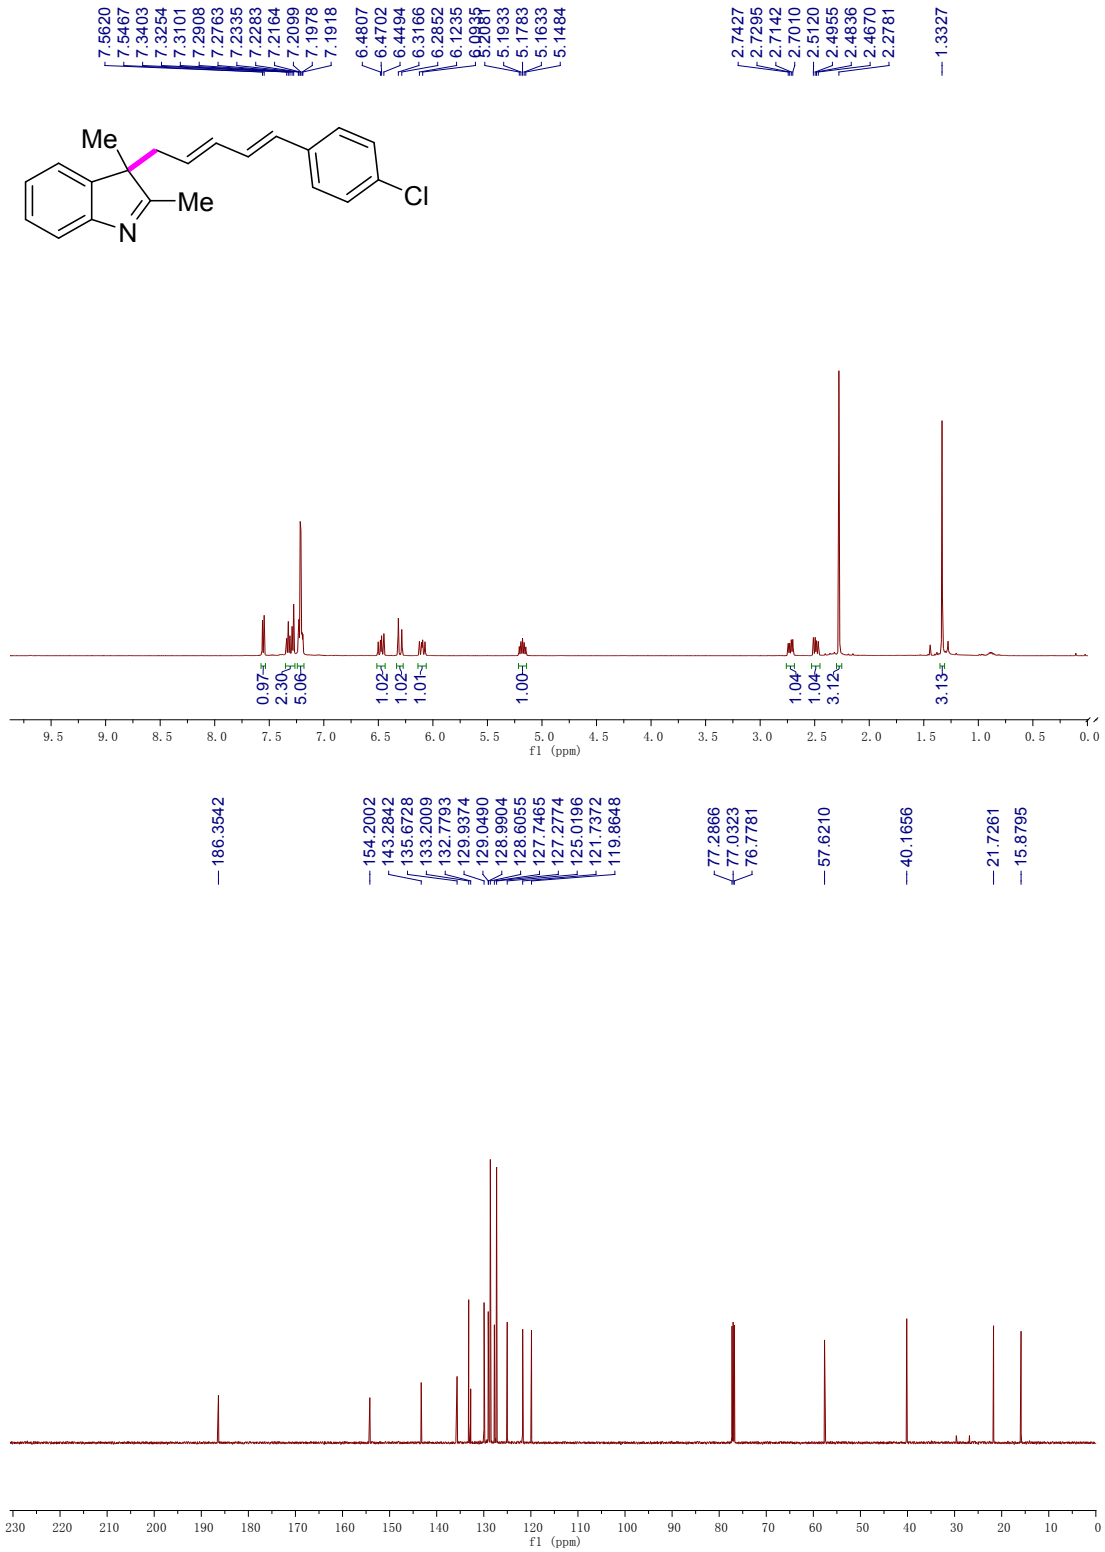

**2,3-dimethyl-3-((2E,4E)-5-(4-(trifluoromethyl)phenyl)penta-2,4-dien-1-yl)-3H-**

indole (3ae)

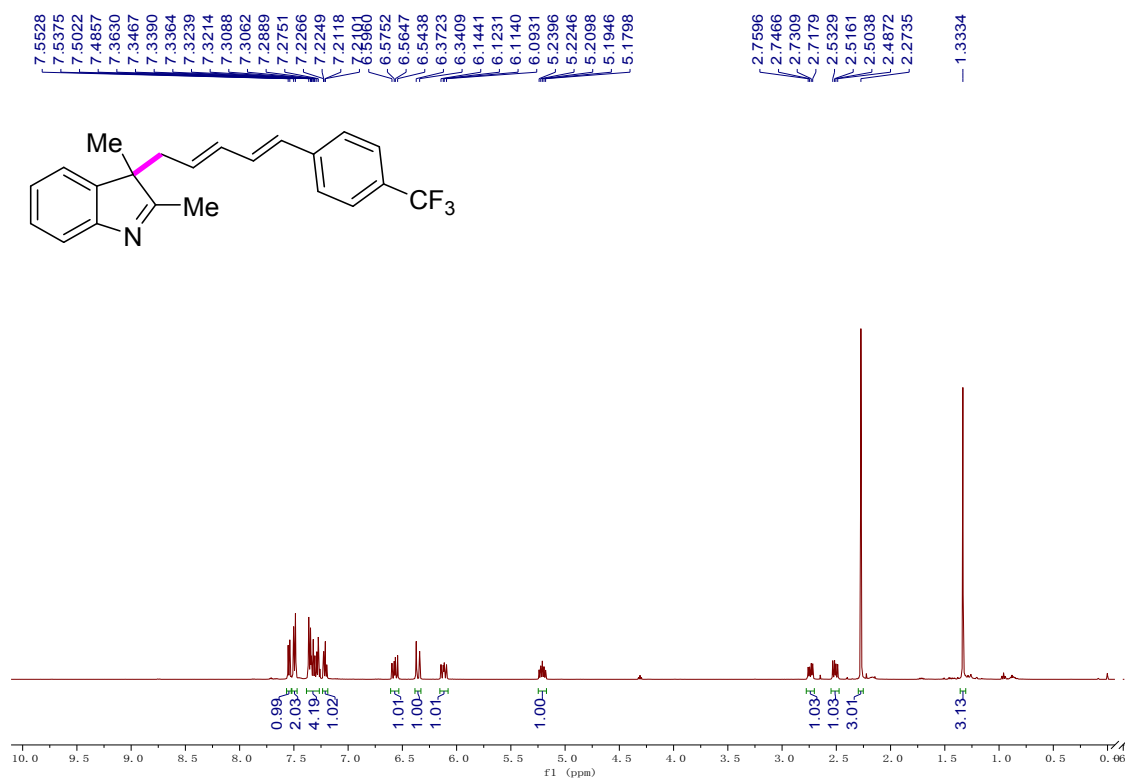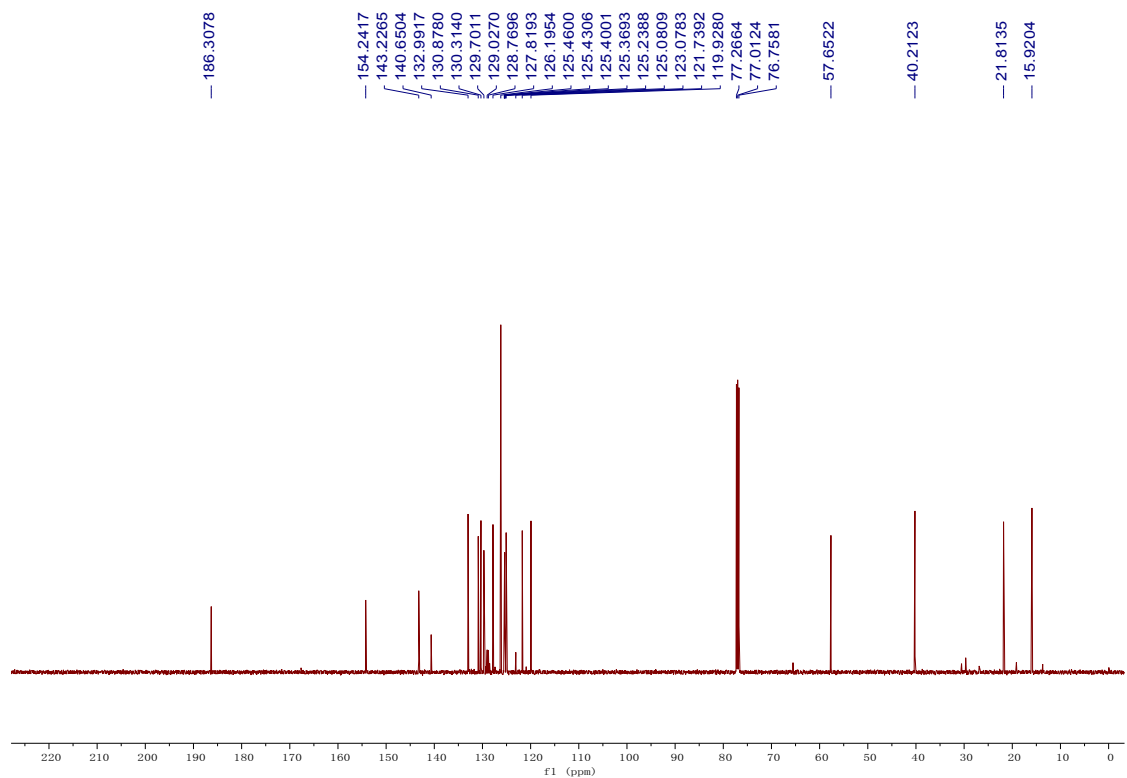

2,3-dimethyl-3-((2E,4E)-5-(m-tolyl)penta-2,4-dien-1-yl)-3H-indole (3ag)

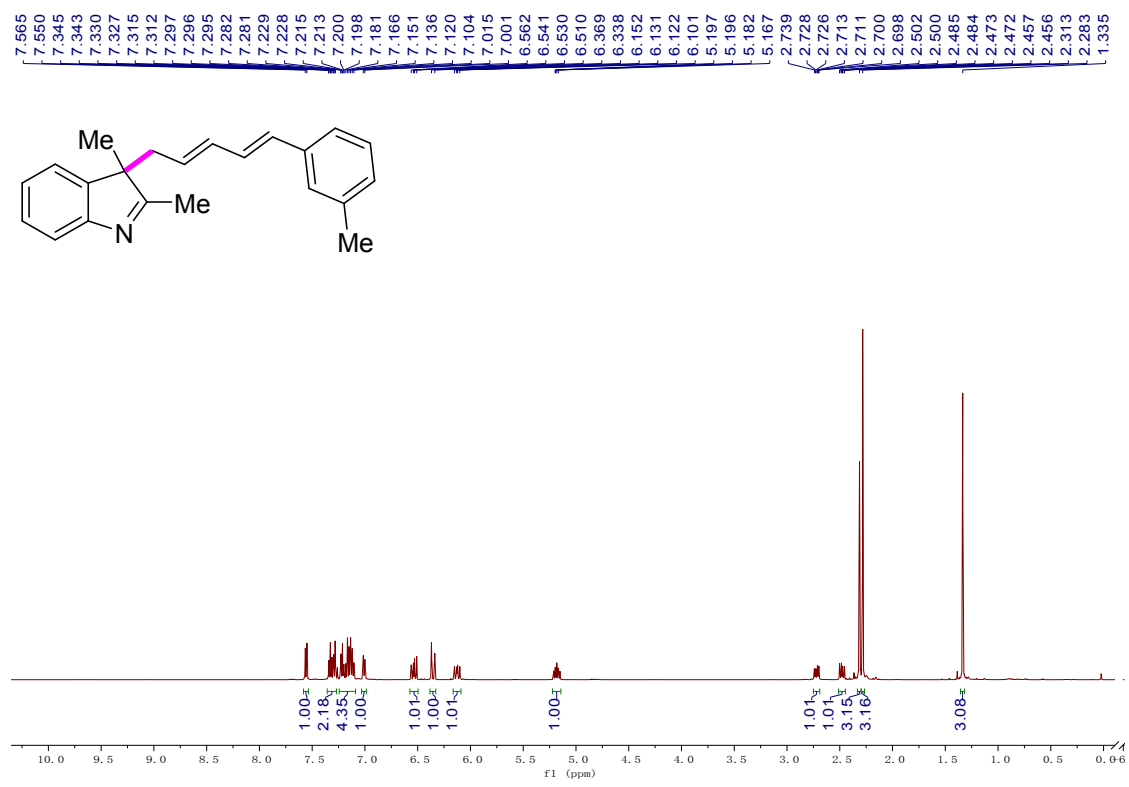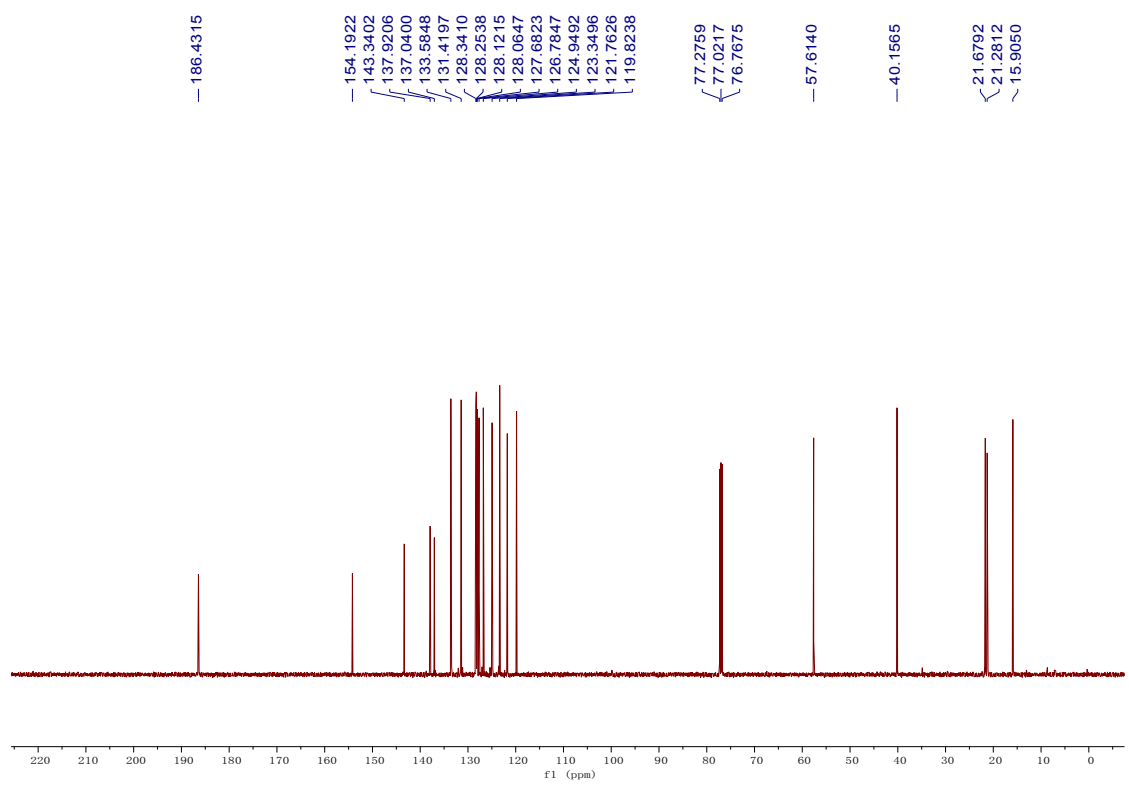

**2,3-dimethyl-3-((2E,4E)-5-(o-tolyl)penta-2,4-dien-1-yl)-3H-indole (3ah)**

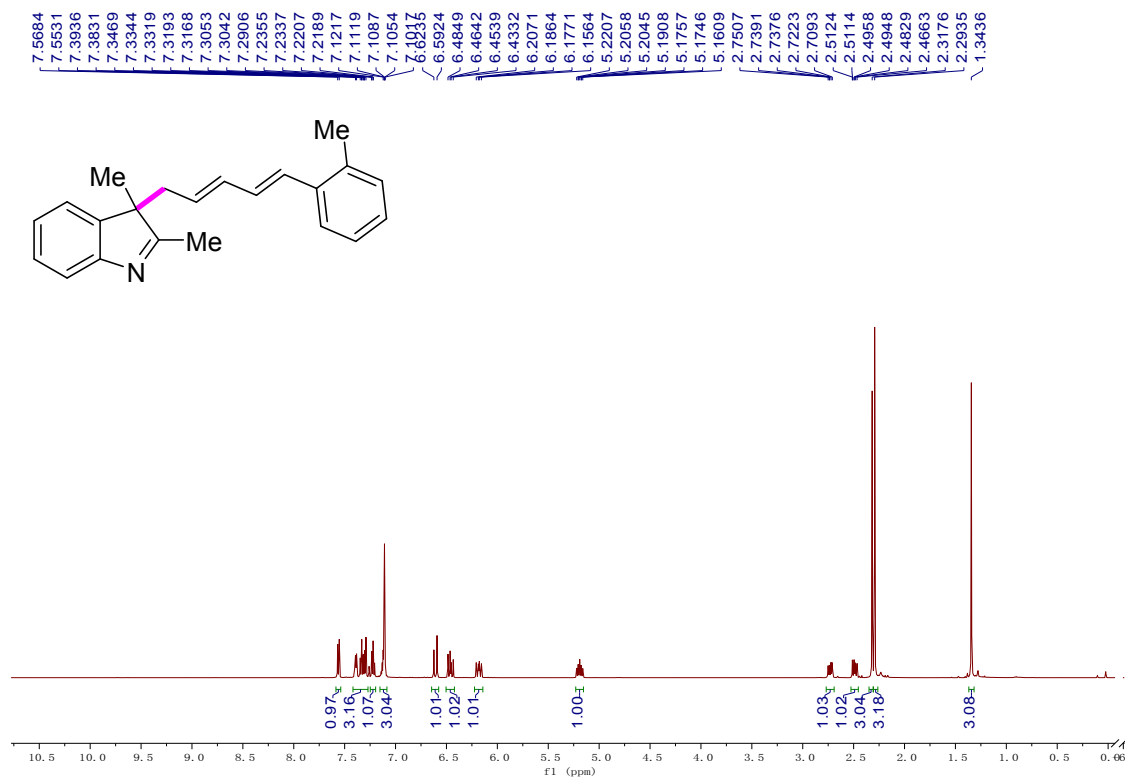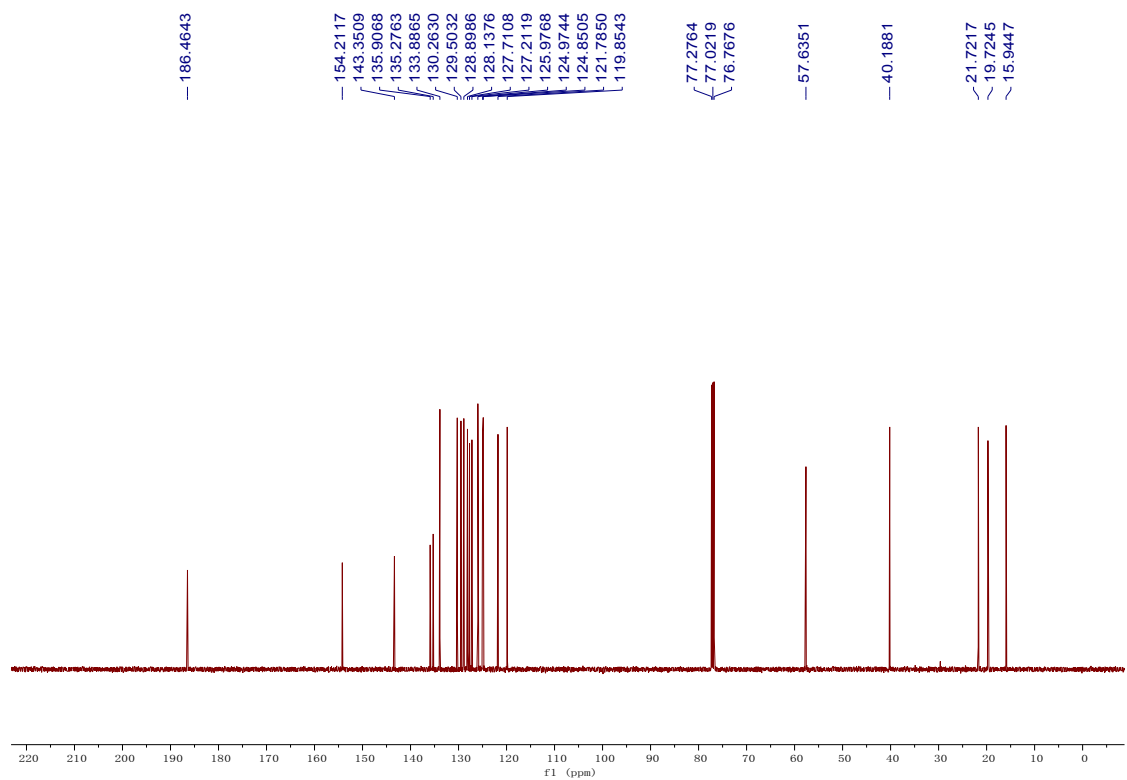

**3-((2E,4E)-5-(4-methoxyphenyl)penta-2,4-dien-1-yl)-2,3-dimethyl-1H-indole (3ai)**



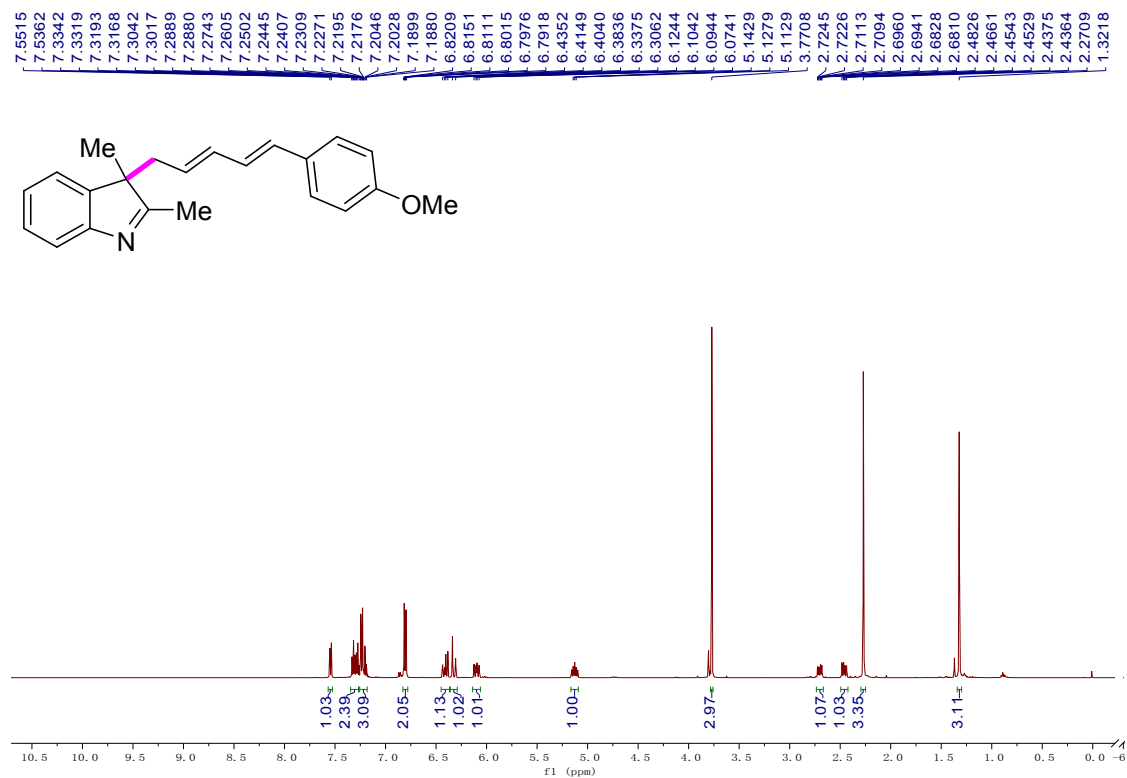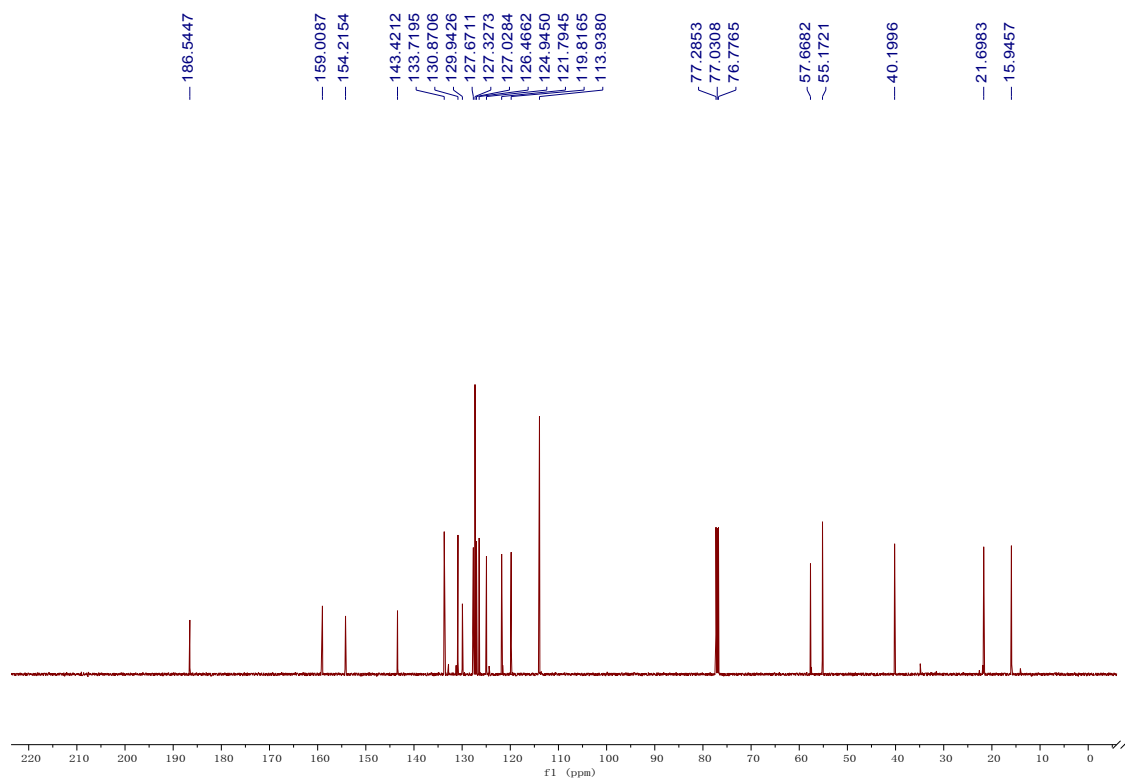

**3-((2E,4E)-5-(2-Fluoro-4-methylphenyl)penta-2,4-dien-1-yl)-2,3-dimethyl-3H-indole (3j)**

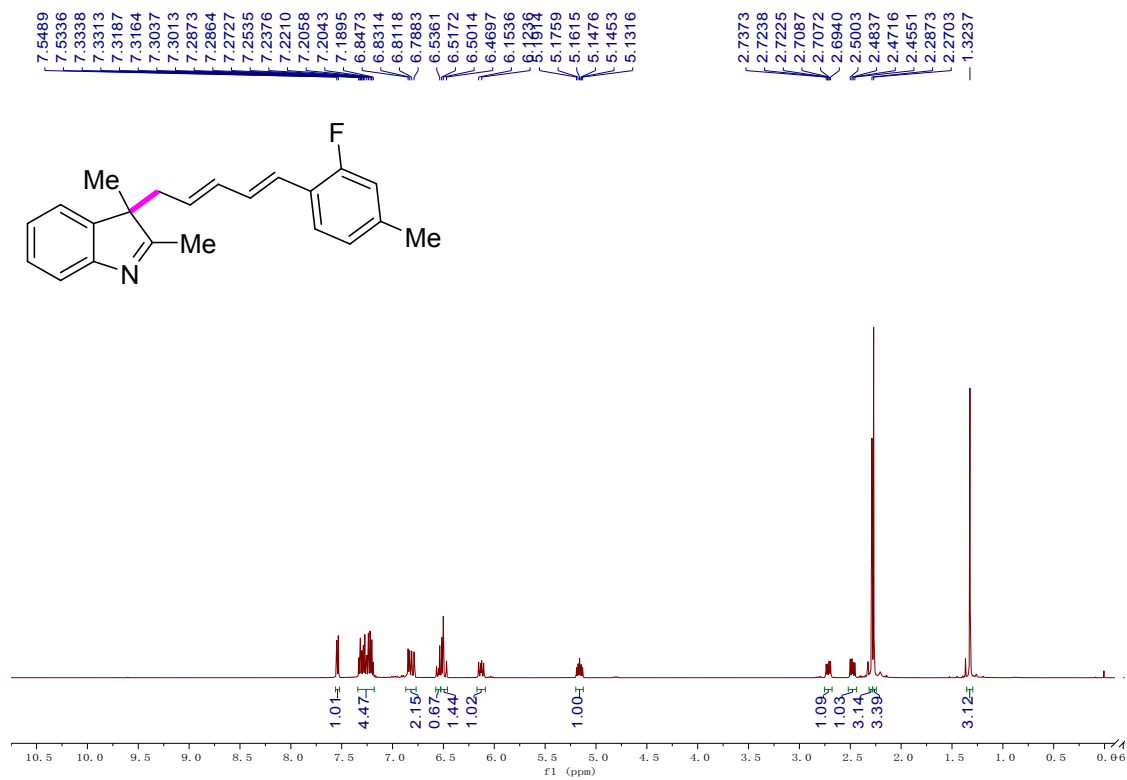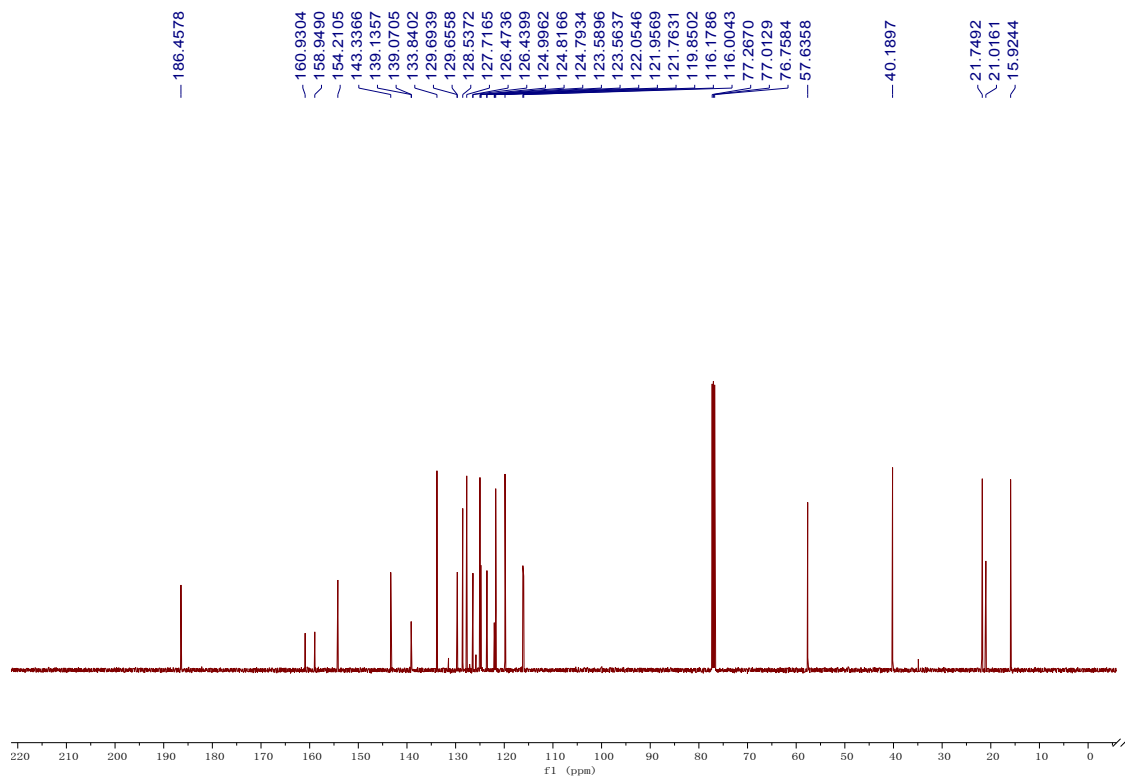

**2,3-dimethyl-3-((2E,4E)-5-(naphthalen-2-yl)penta-2,4-dien-1-yl)-3H-indole (3ak)**

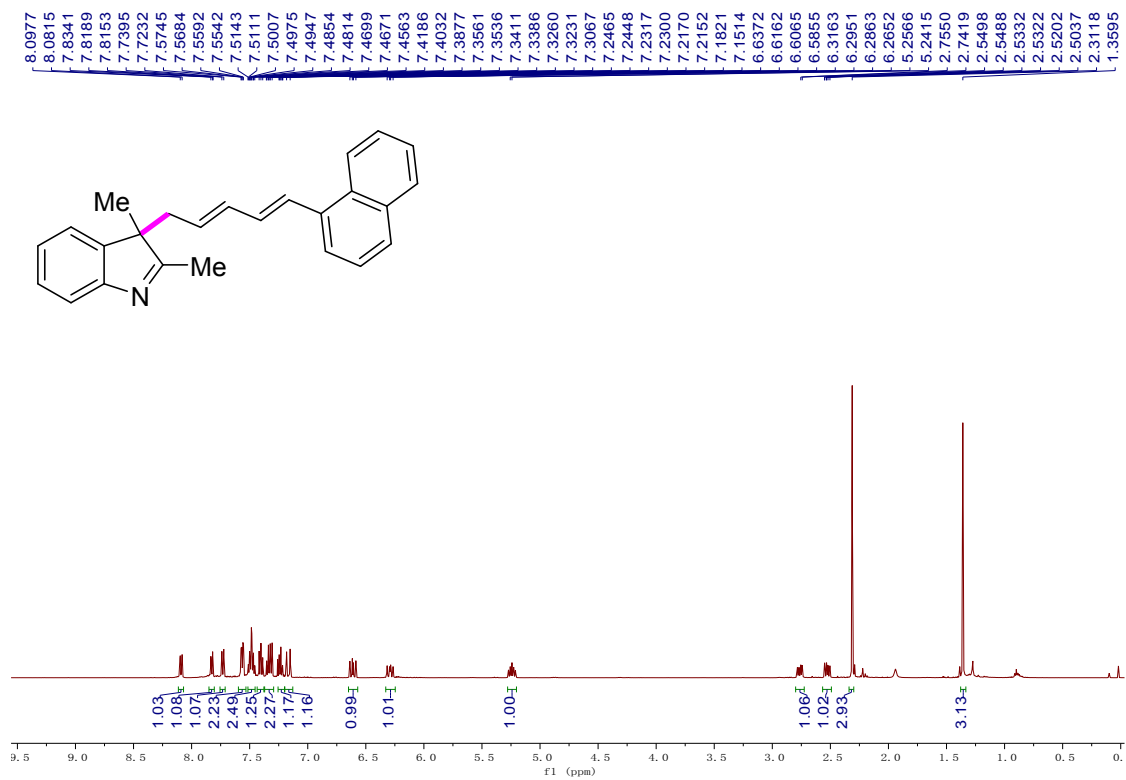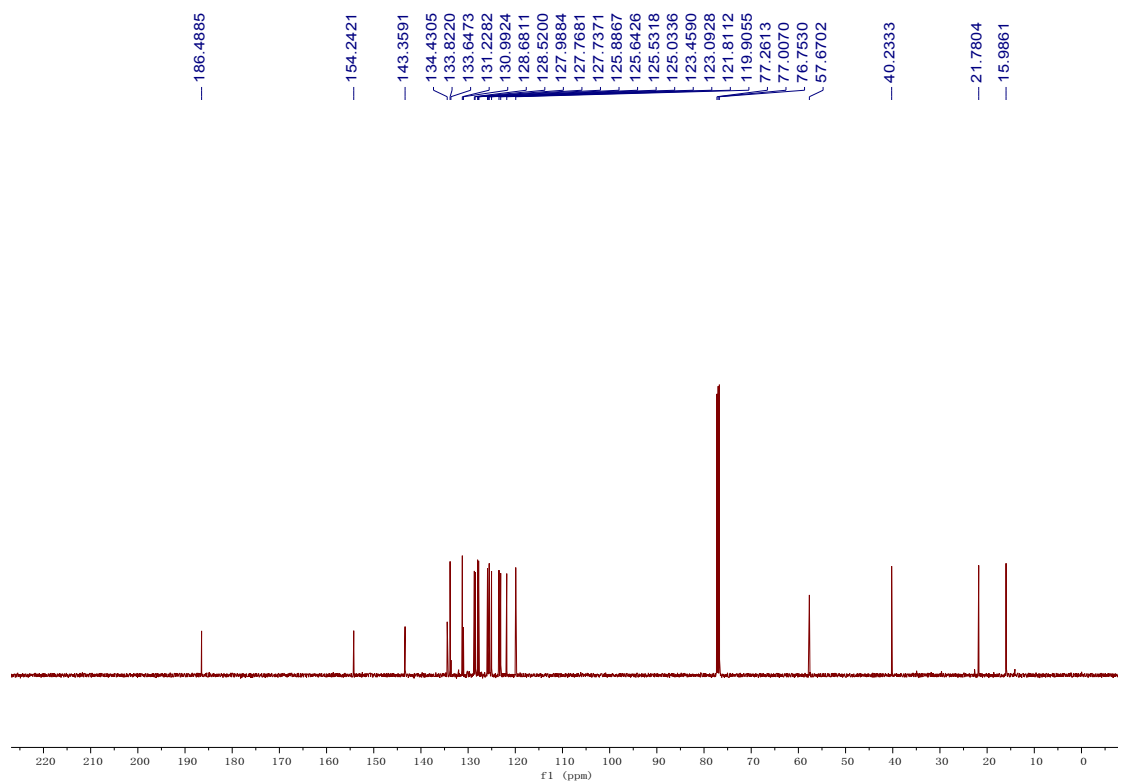

**2, 3-dimethyl-3-((2E,4E)-5-(thiophen-3-yl)penta-2,4-dien-1-yl)-3H- indole (3a)**

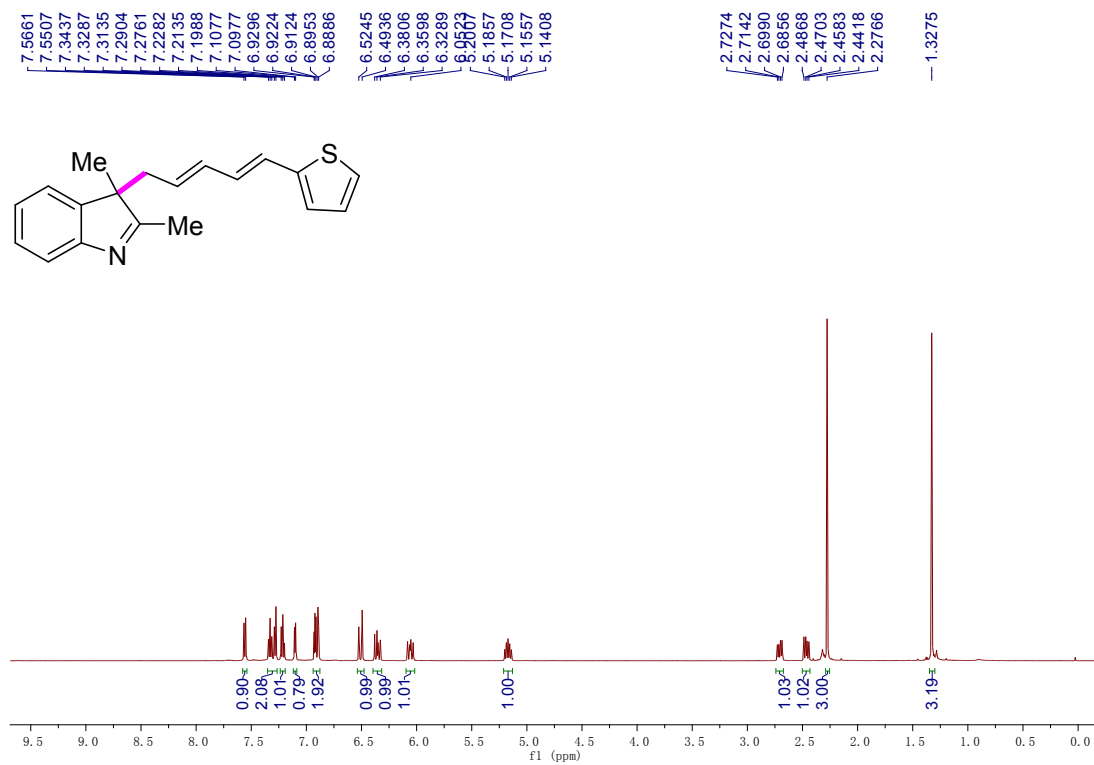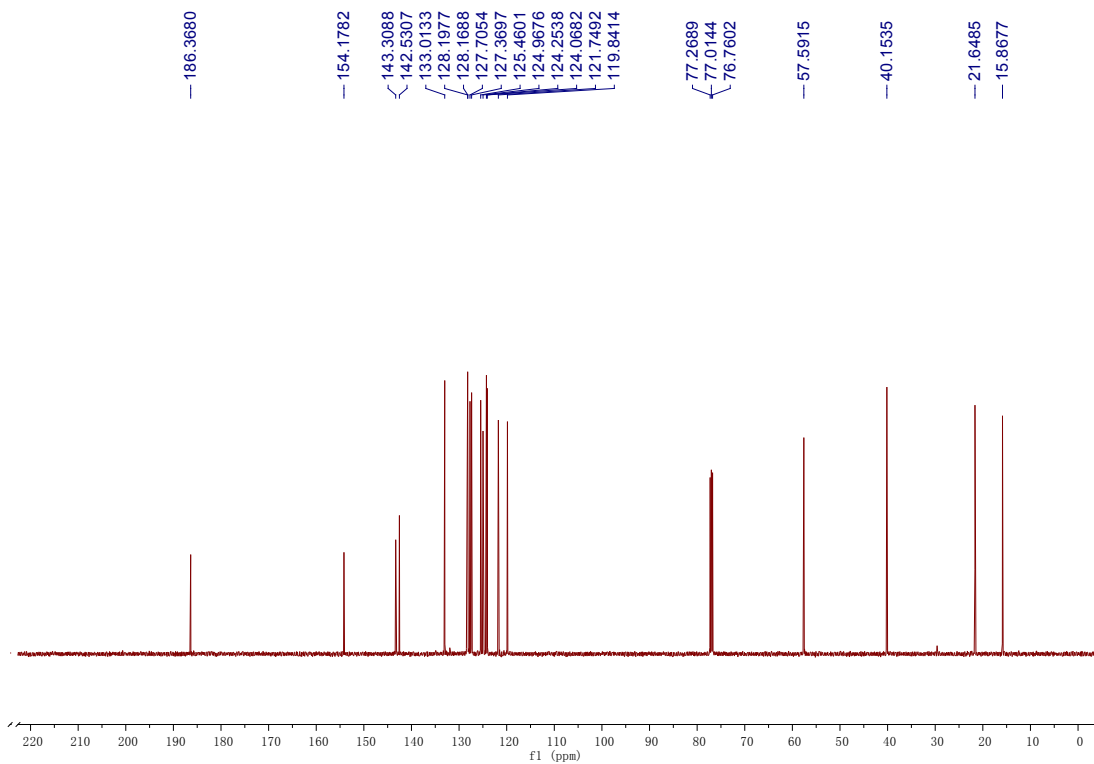

5-fluoro-2,3-dimethyl-3-((2E,4E)-5-phenylpenta-2,4-dien-1-yl)-3H-indole (3am)

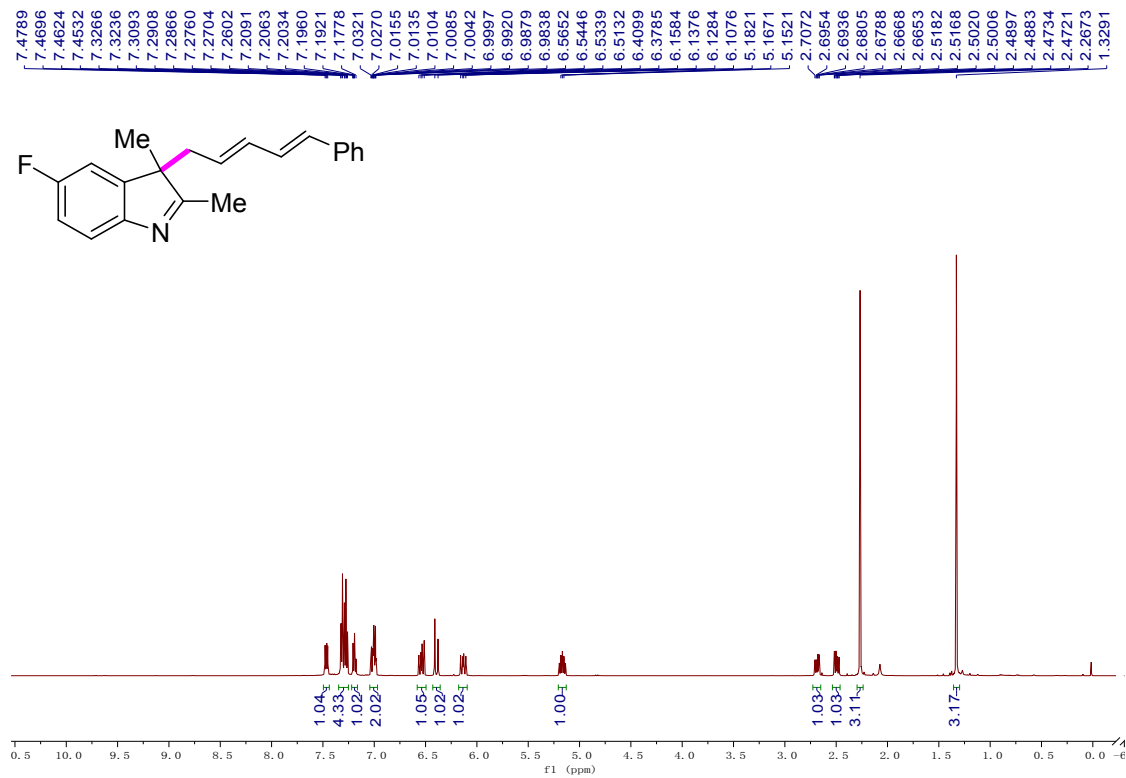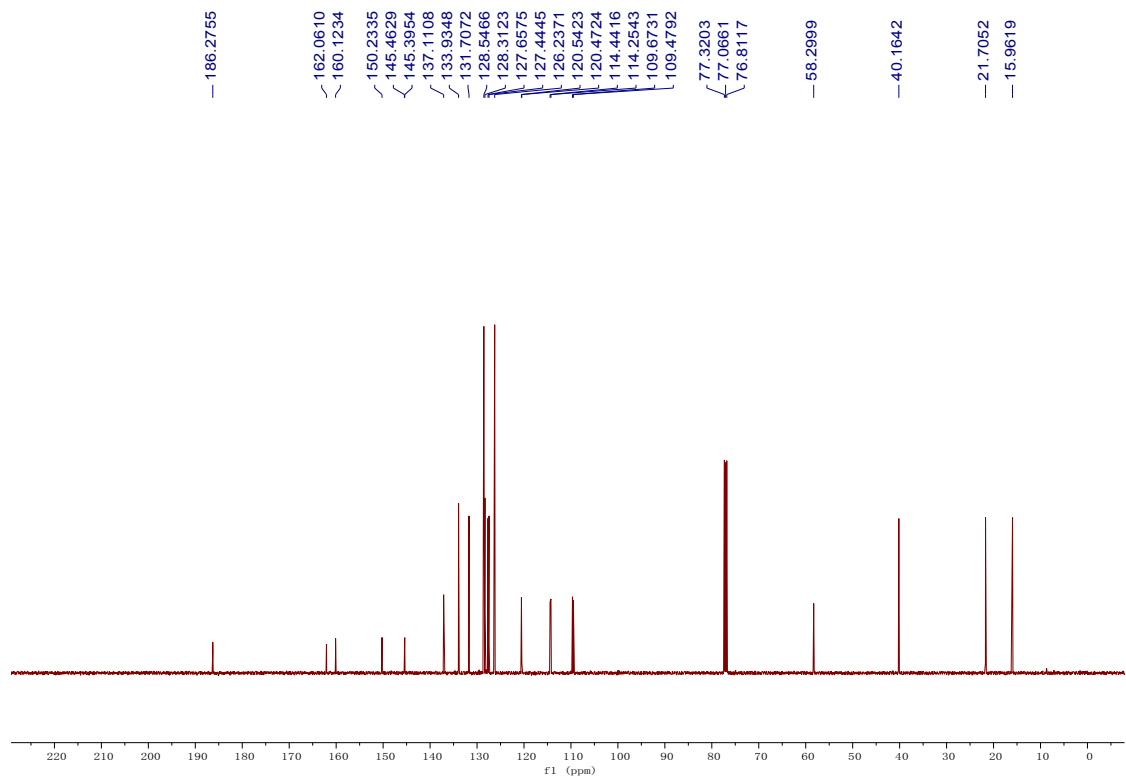

5-chloro-2,3-dimethyl-3-((2E,4E)-5-phenylpenta-2,4-dien-1-yl)-3H-indole (3an)

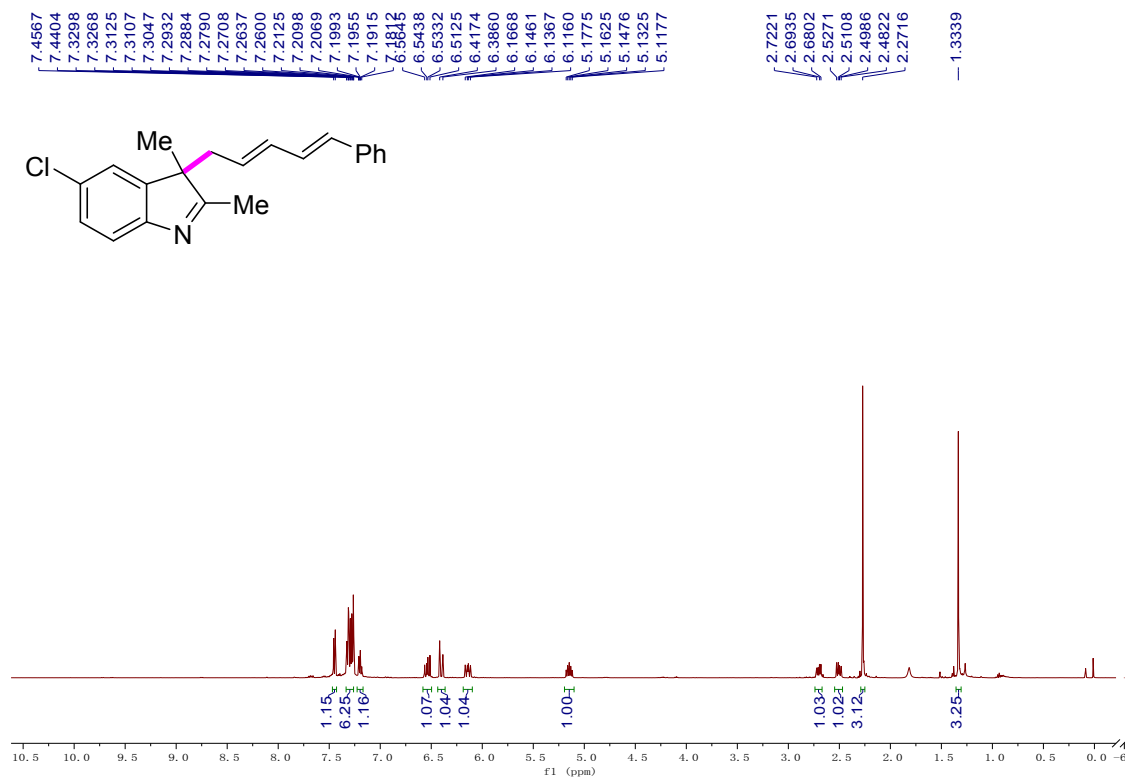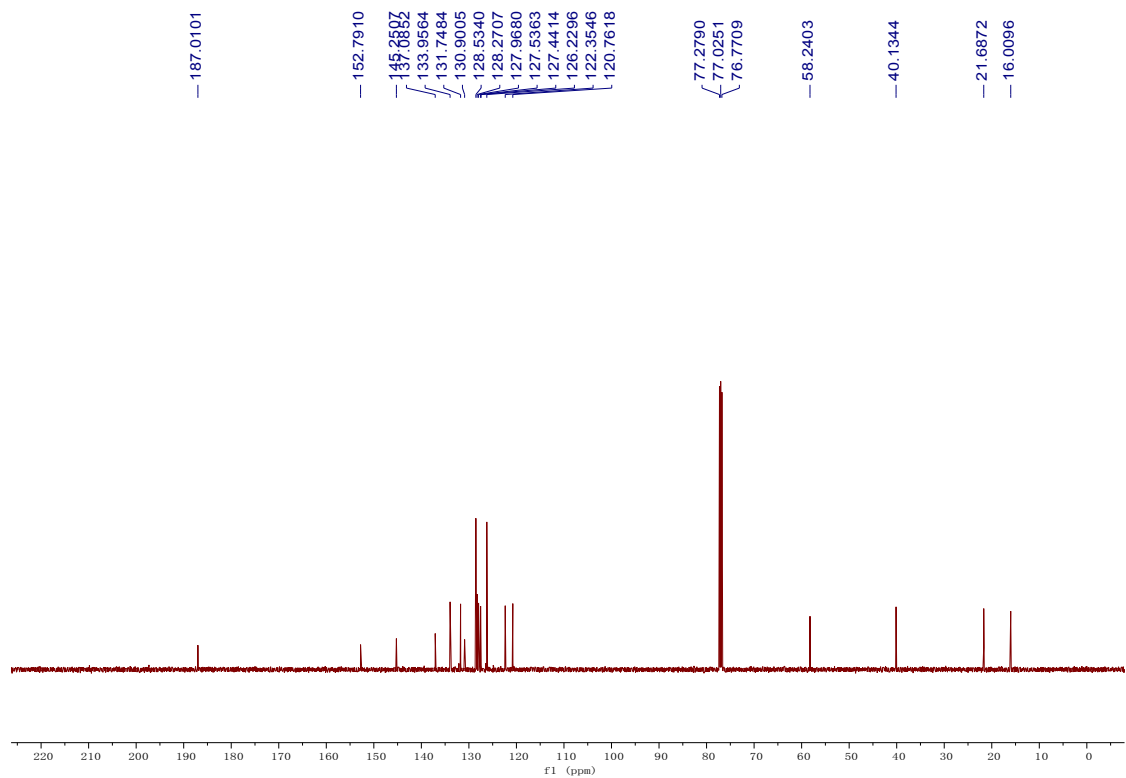

**5-benzyloxy-2,3-dimethyl-3-((2E,4E)-5-phenylpenta-2,4-dien-1-yl)-3H-indole (3ao)**

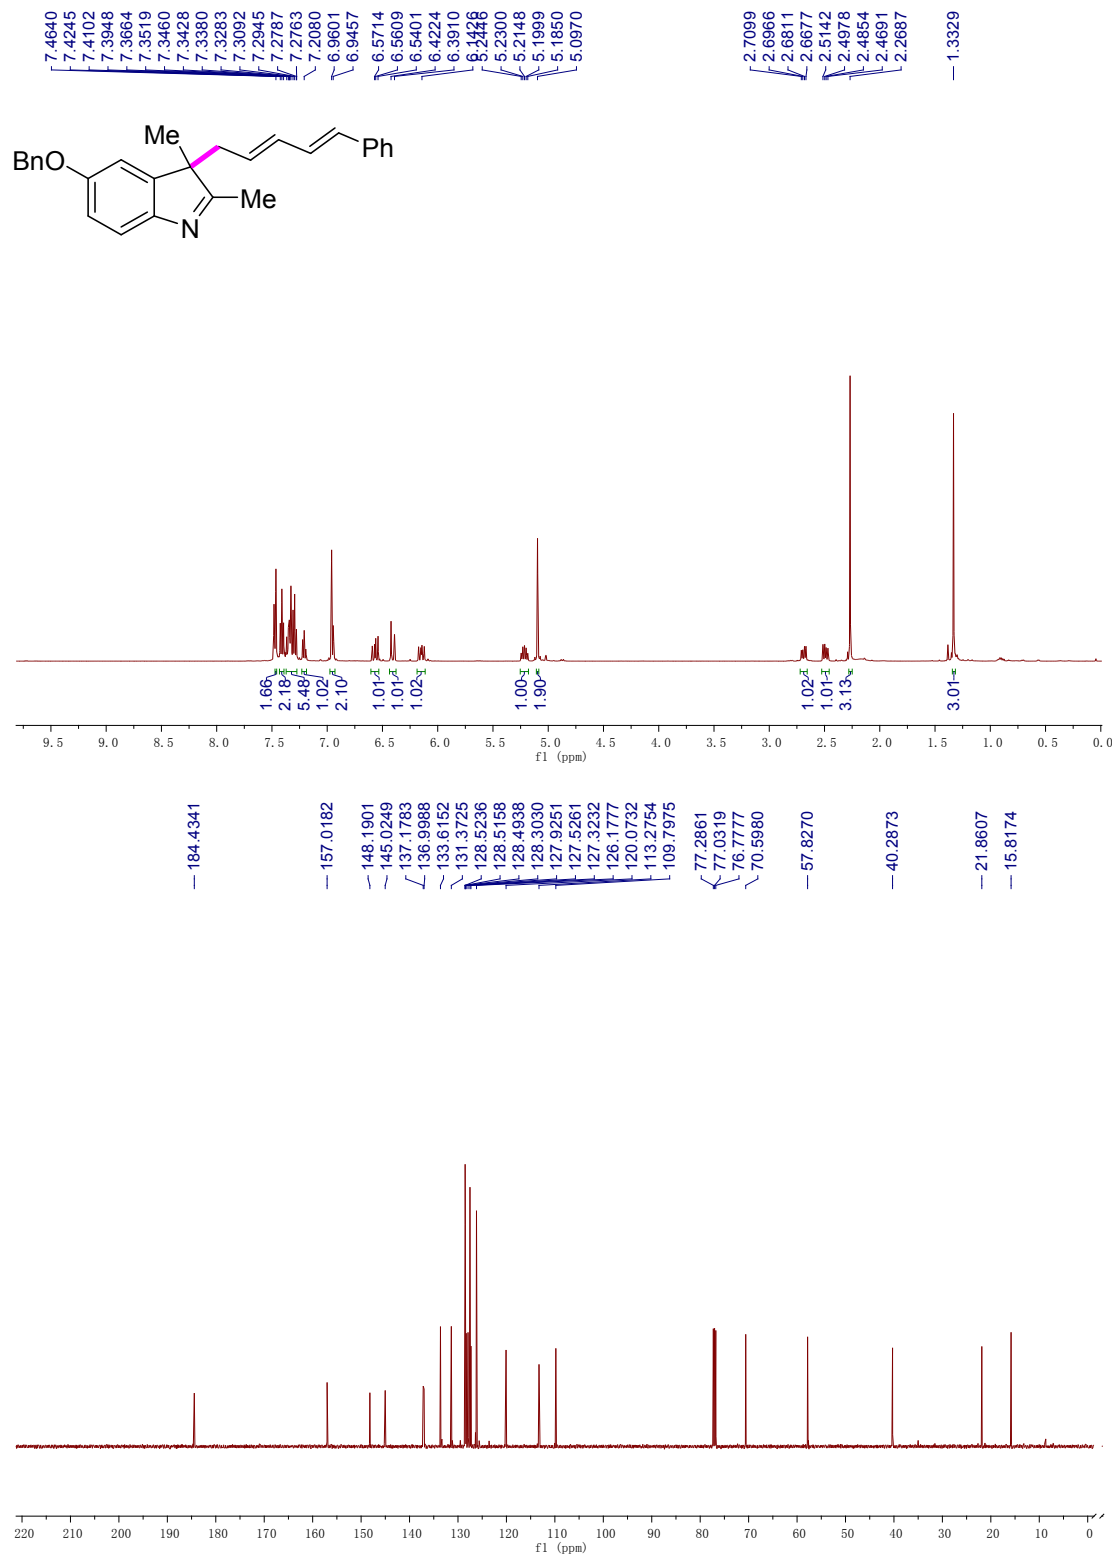

**5-methyl-2,3-dimethyl-3-((2E,4E)-5-phenylpenta-2,4-dien-1-yl)-3H-indole (3ap)**

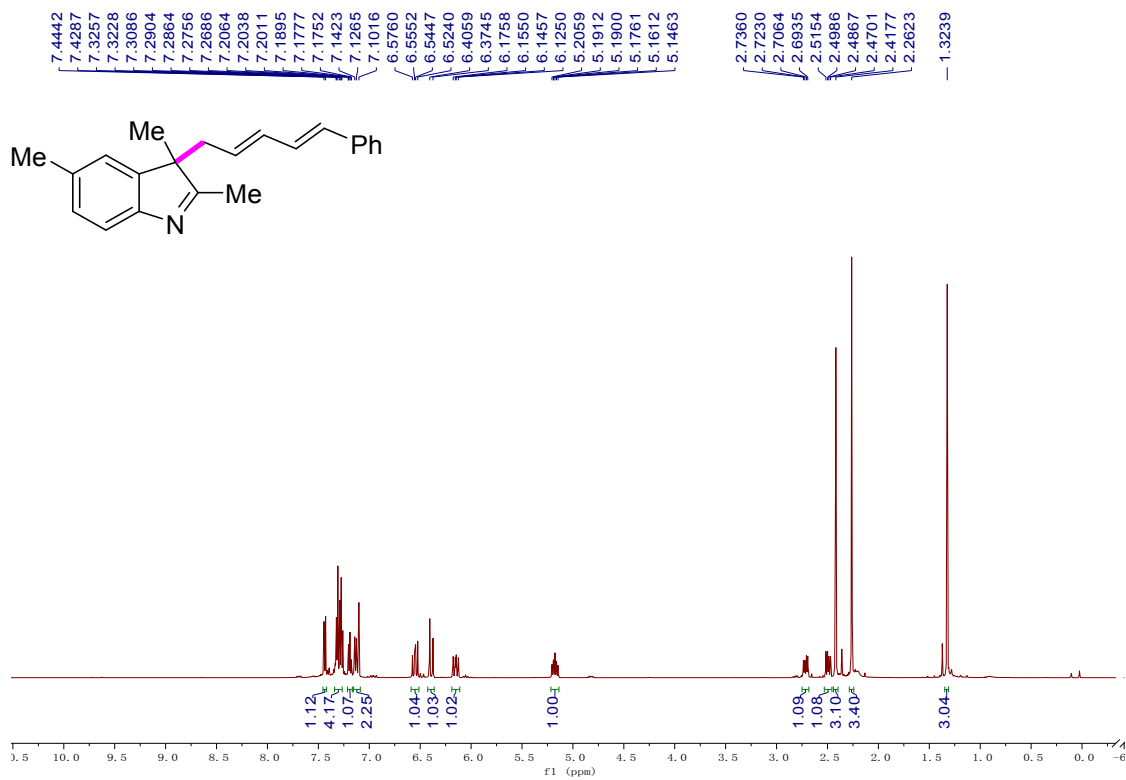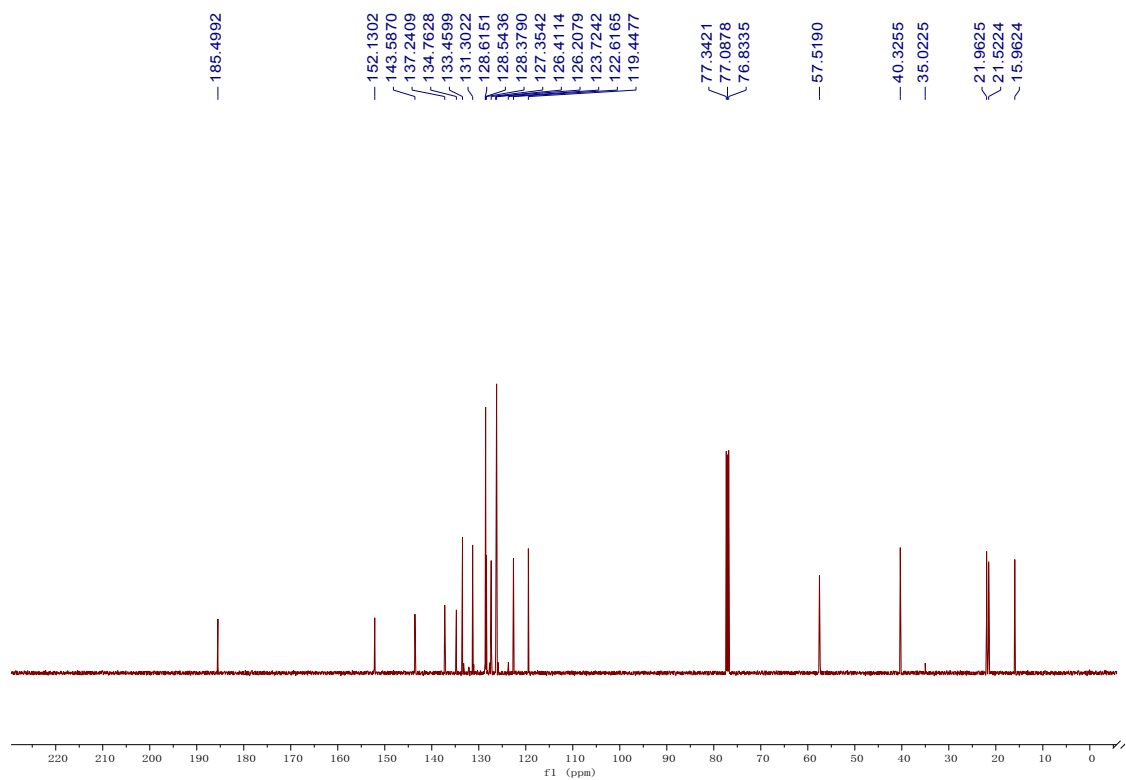

**2,3,4-trimethyl-3-((2E,4E)-5-phenylpenta-2,4-dien-1-yl)-3H-indole (3aq)**



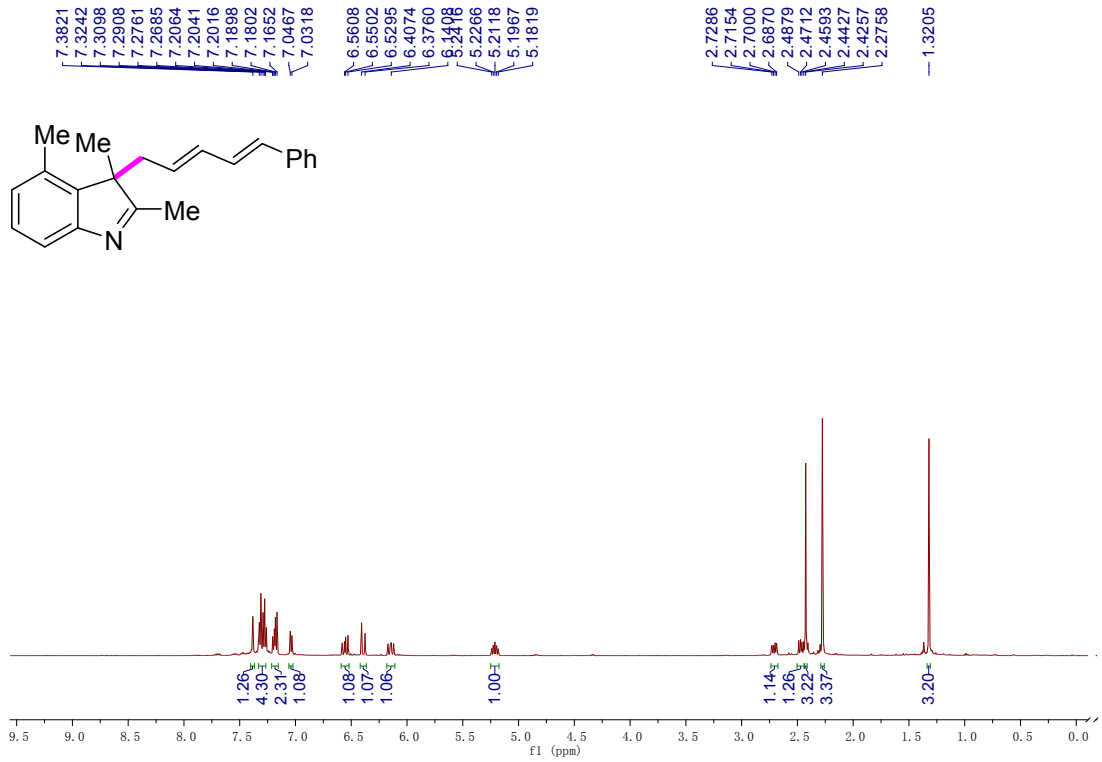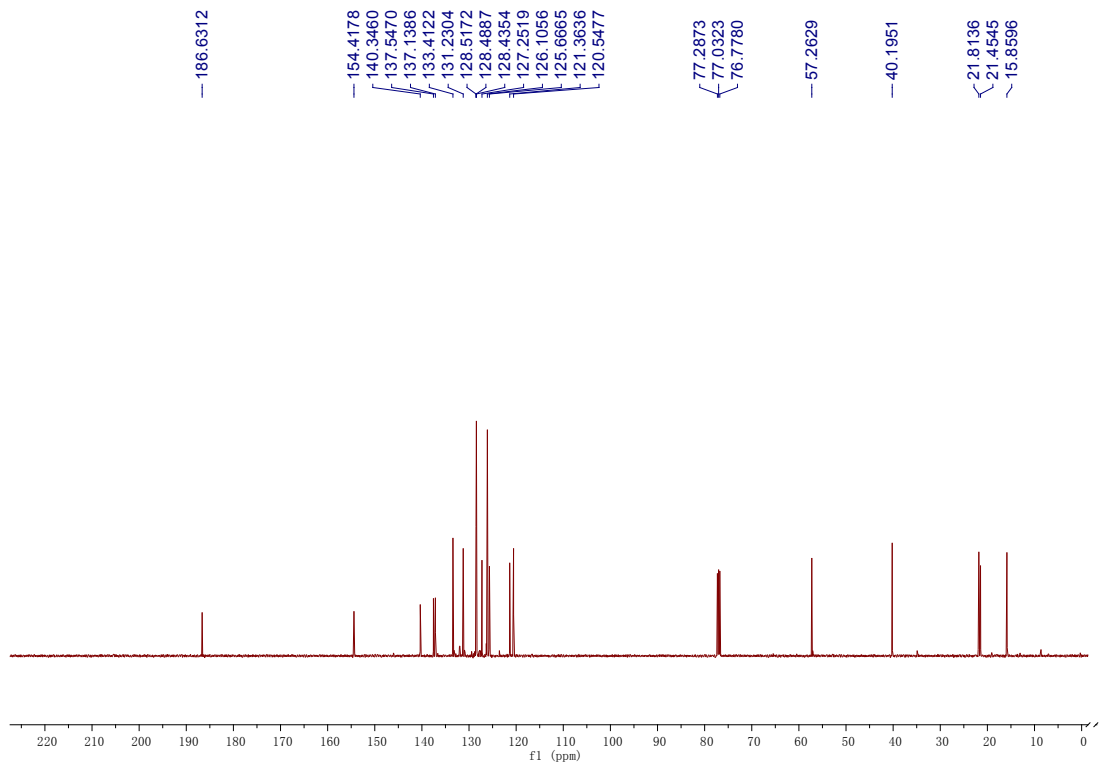

**2,3,7-trimethyl-3-((2E,4E)-5-phenylpenta-2,4-dien-1-yl)-3H-indole (3ar)**

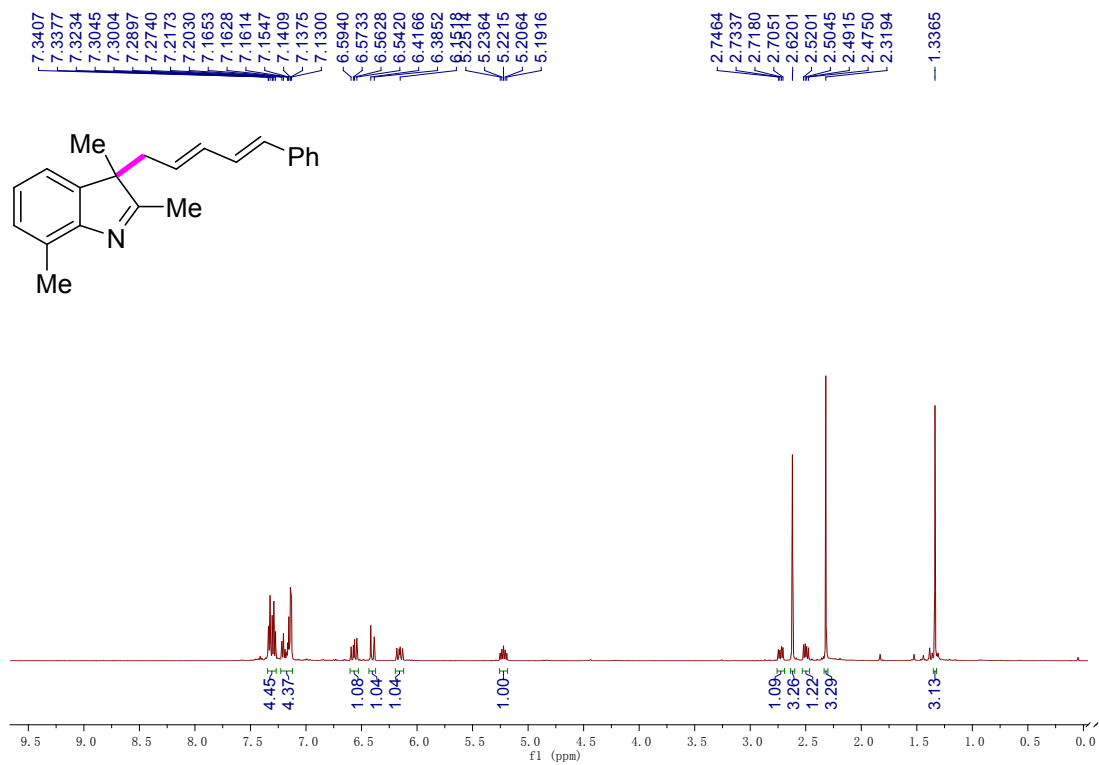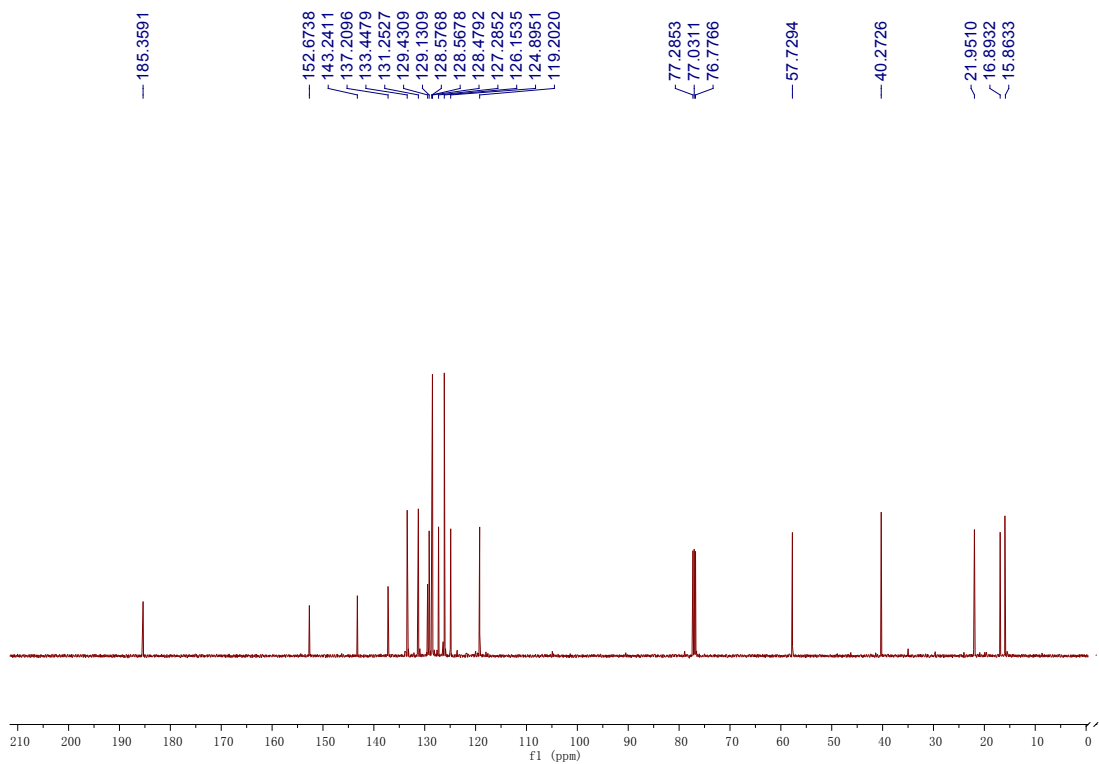

**2,3,4,6-tetramethyl-3-((2E,4E)-5-phenylpenta-2,4-dien-1-yl)-3H-indole (3as)**

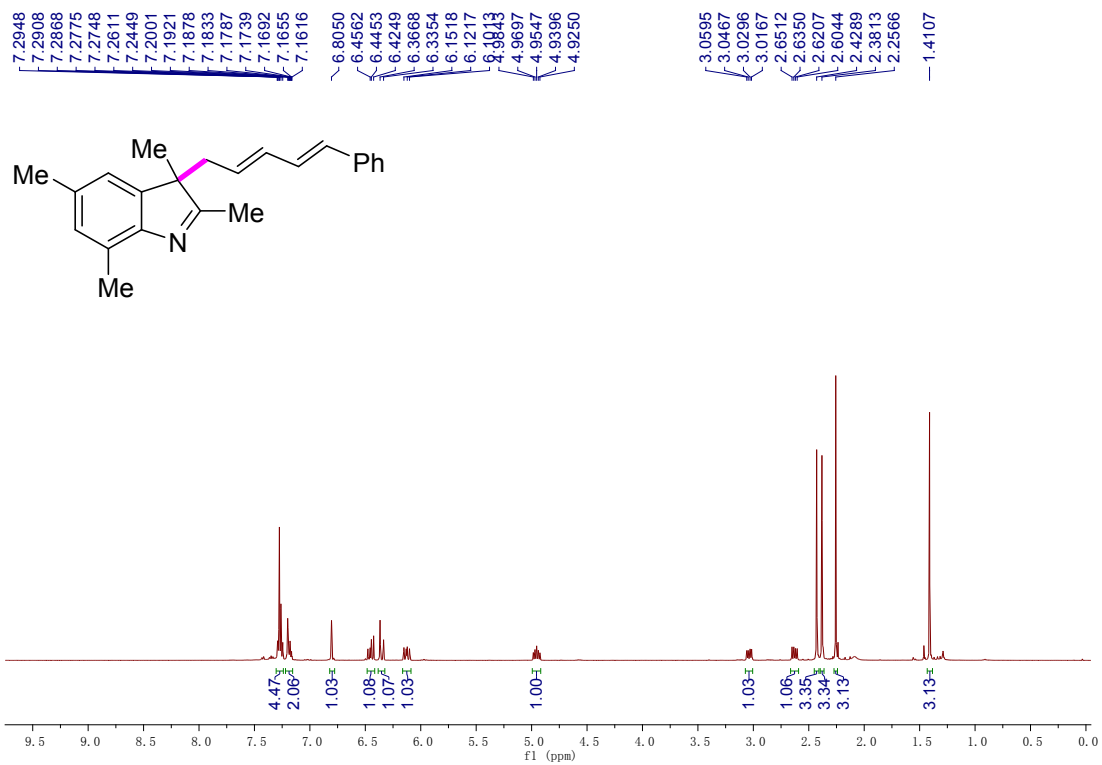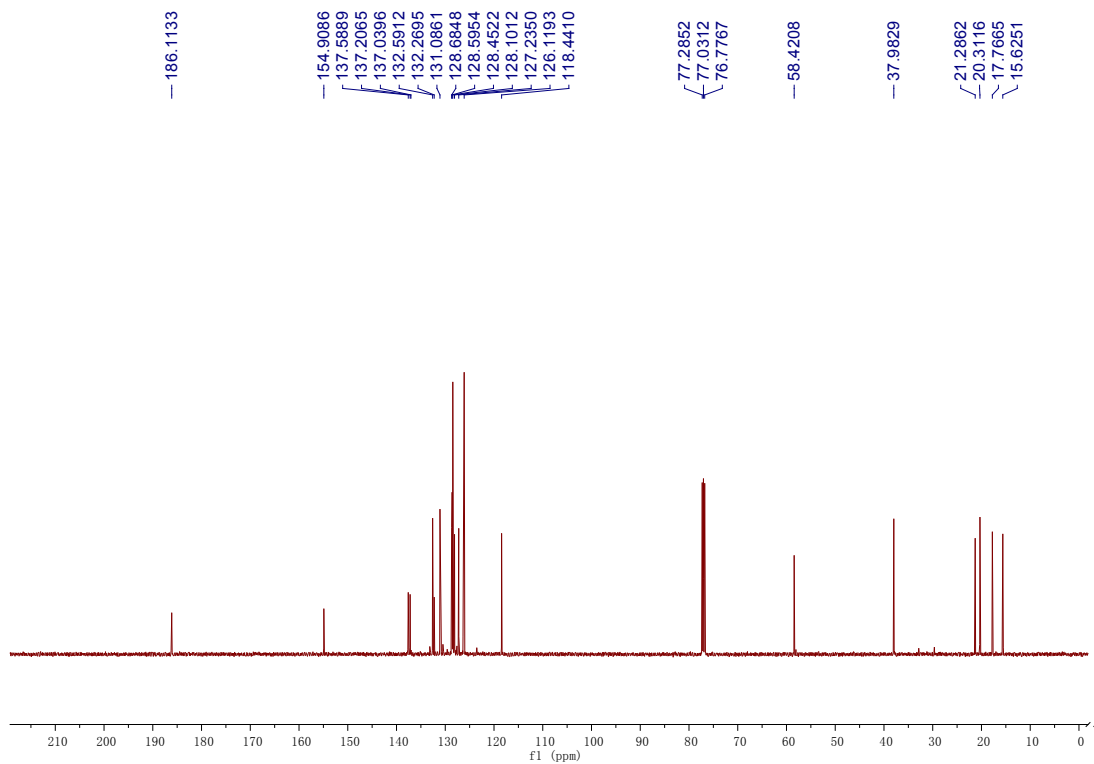

**2,3-dimethyl-3-((2E,4E)-5-phenylpenta-2,4-dien-1-yl)-3H-benzo[g]indole (3at)**

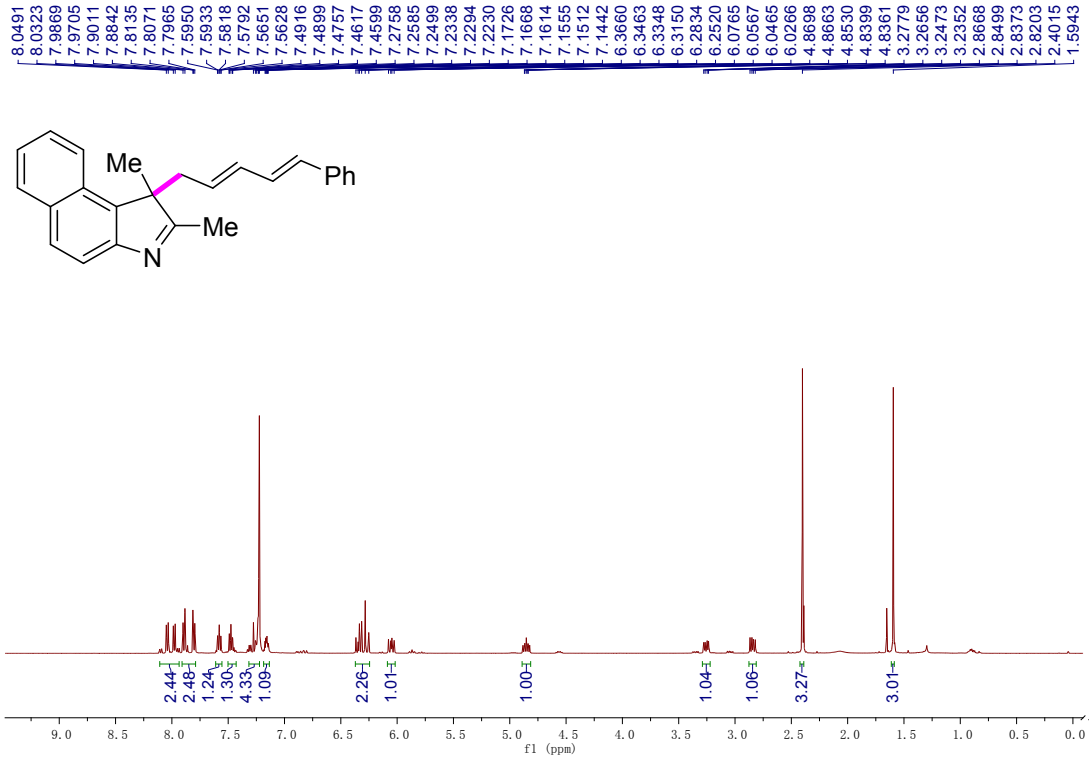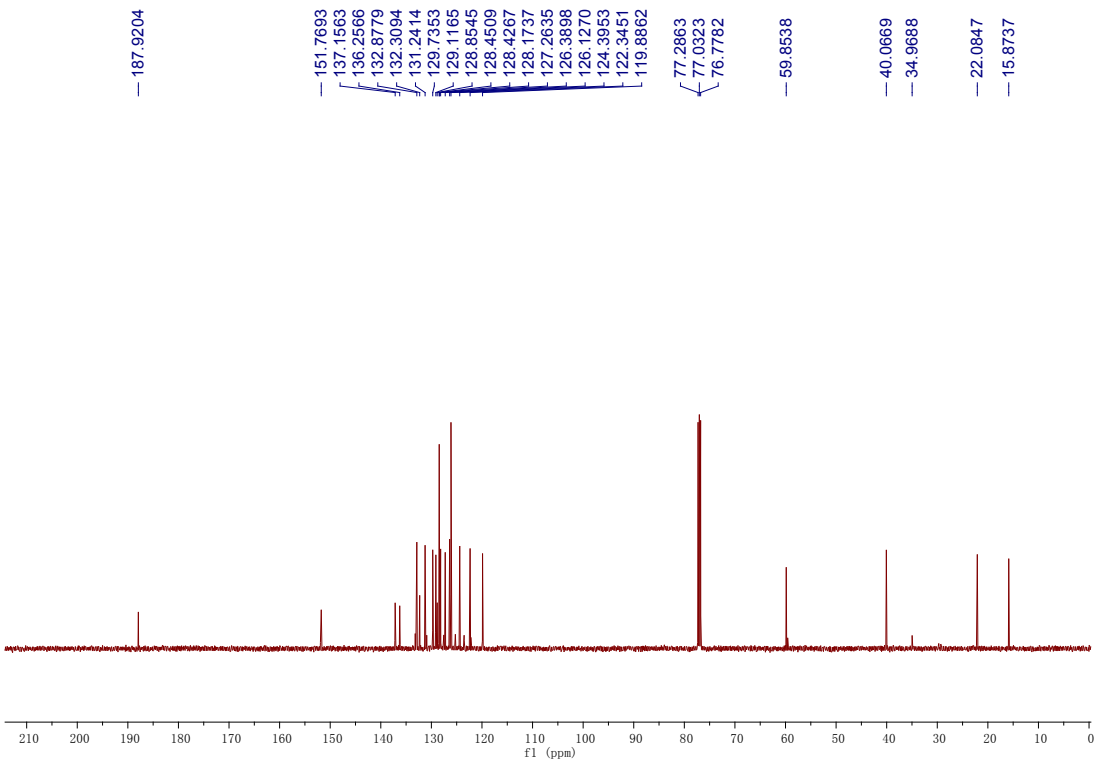

**3-benzyl-2-methyl-3-((2E,4E)-5-phenylpenta-2,4-dien-1-yl)-3H-indole (3au)**

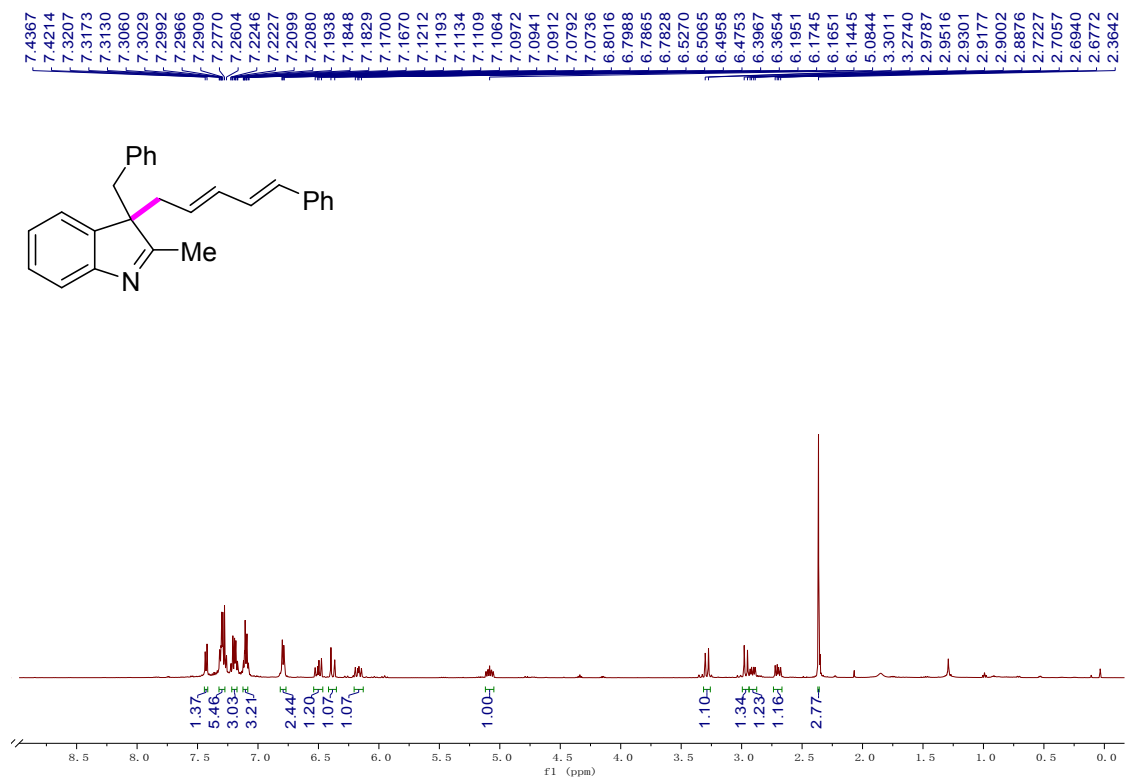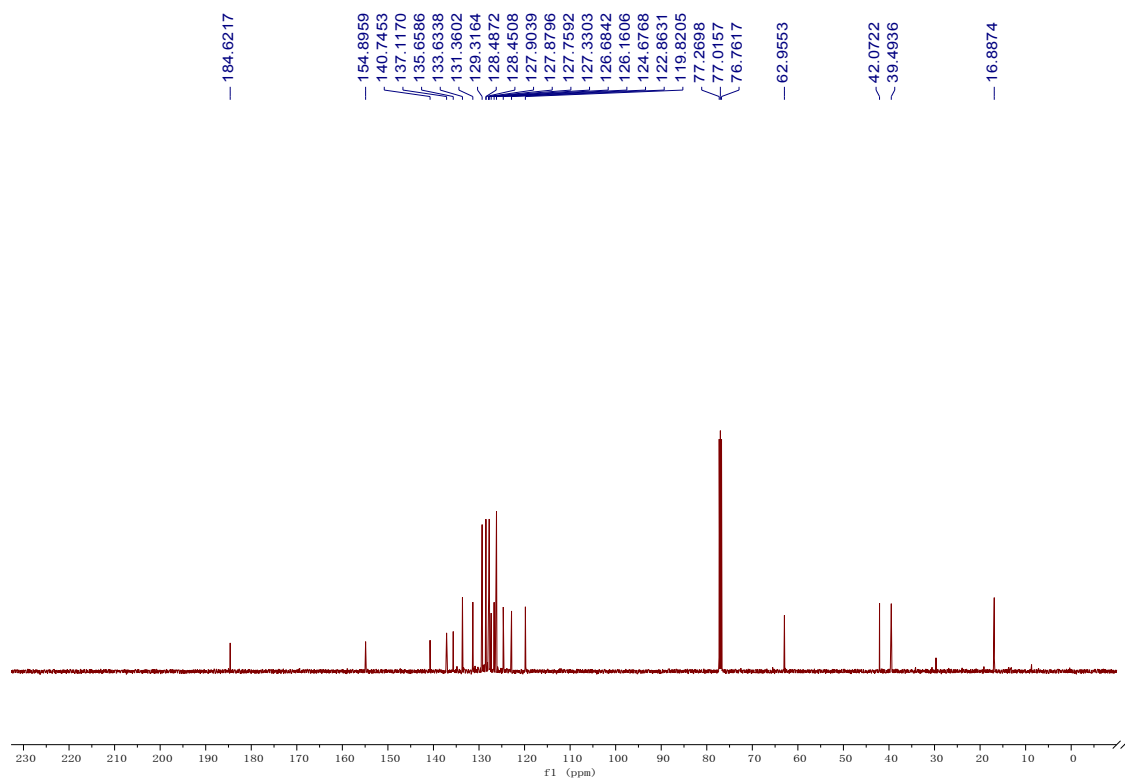

4a-((2E,4E)-5-phenylpenta-2,4-dien-1-yl)-2,3,4,4a-tetrahydro-1H-carbazole (3av)

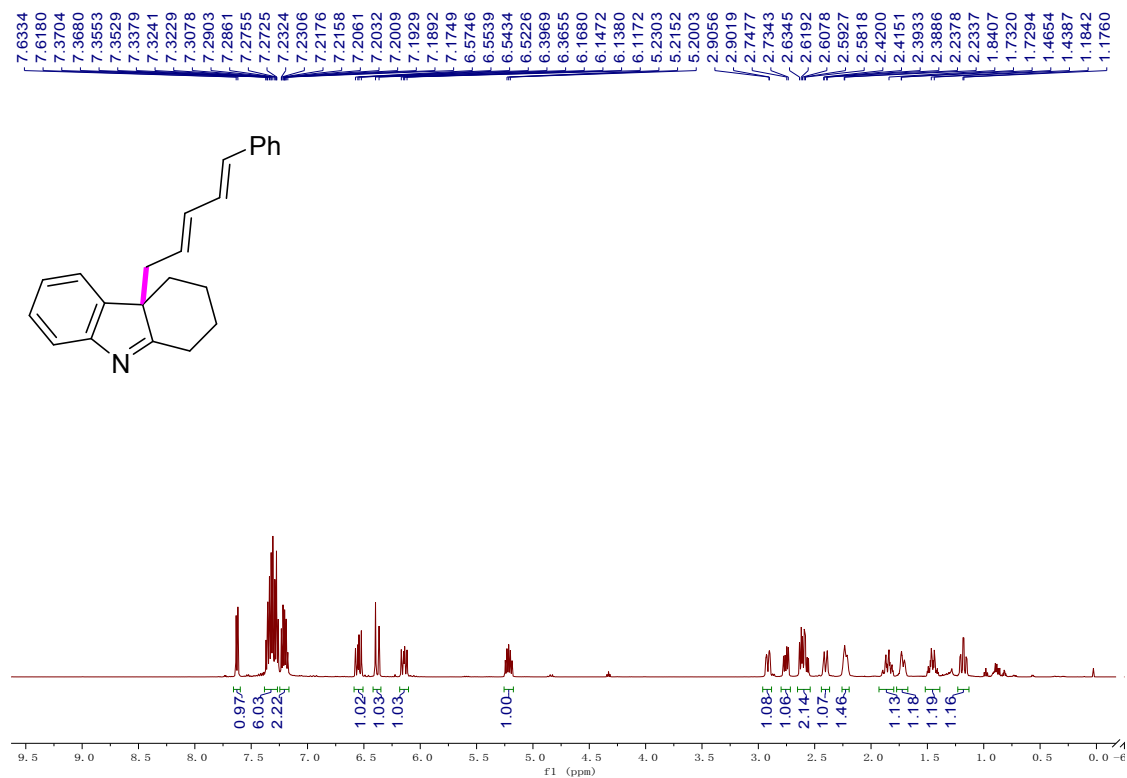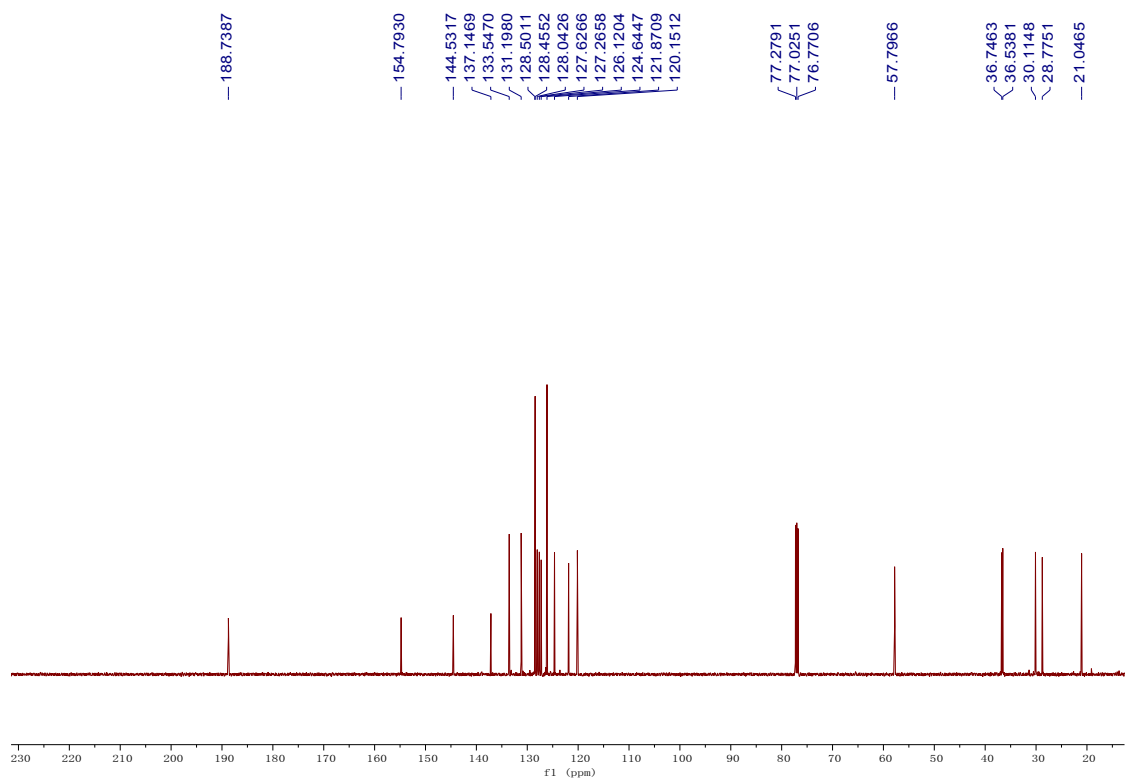

**1,3-dimethyl-1-((2E,4E)-5-phenylpenta-2,4-dien-1-yl)naphthalen-2(1H)-one (5a)**

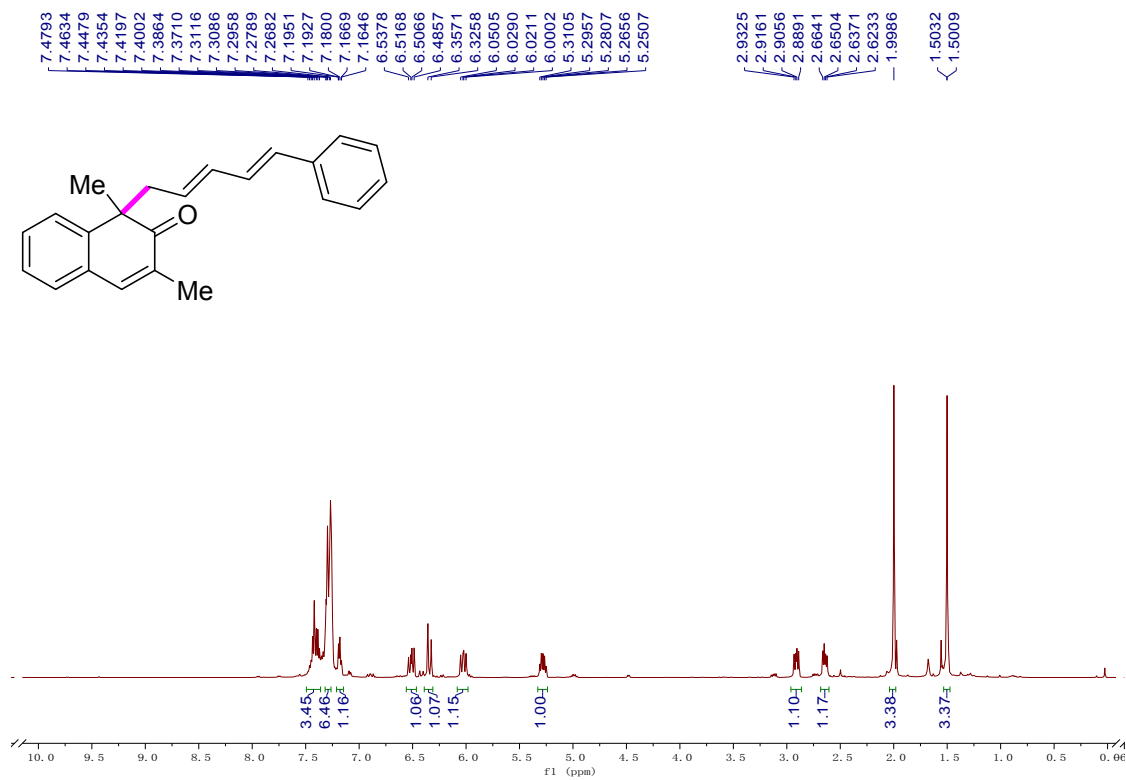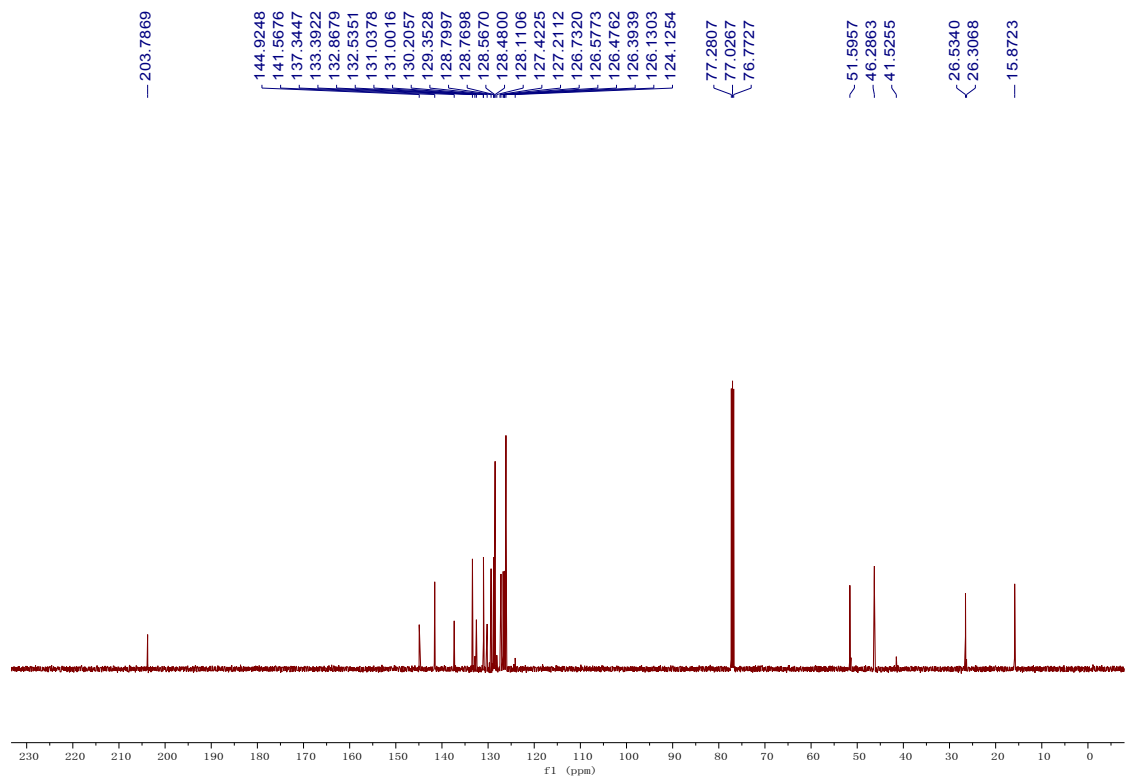

**1,3-dimethyl-1-((2E,4E)-5-(3-fluorophenyl)penta-2,4-dien-1-yl)naphthalen-2(1H)-one (5b)**

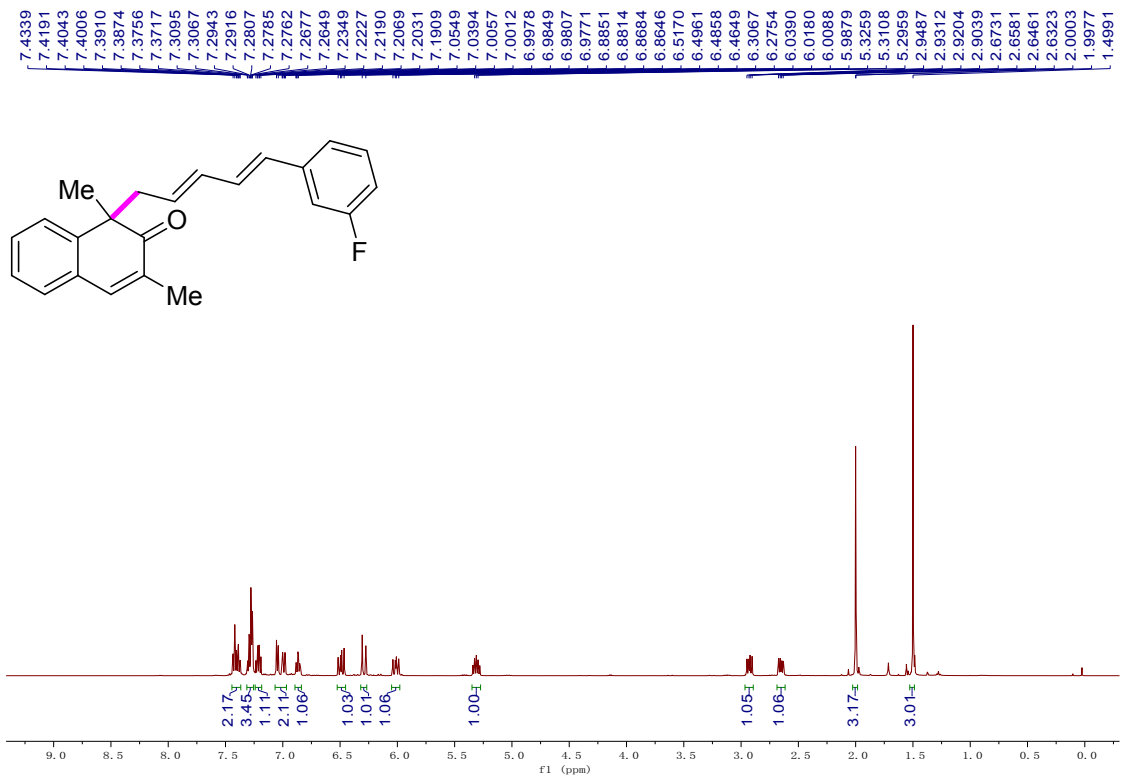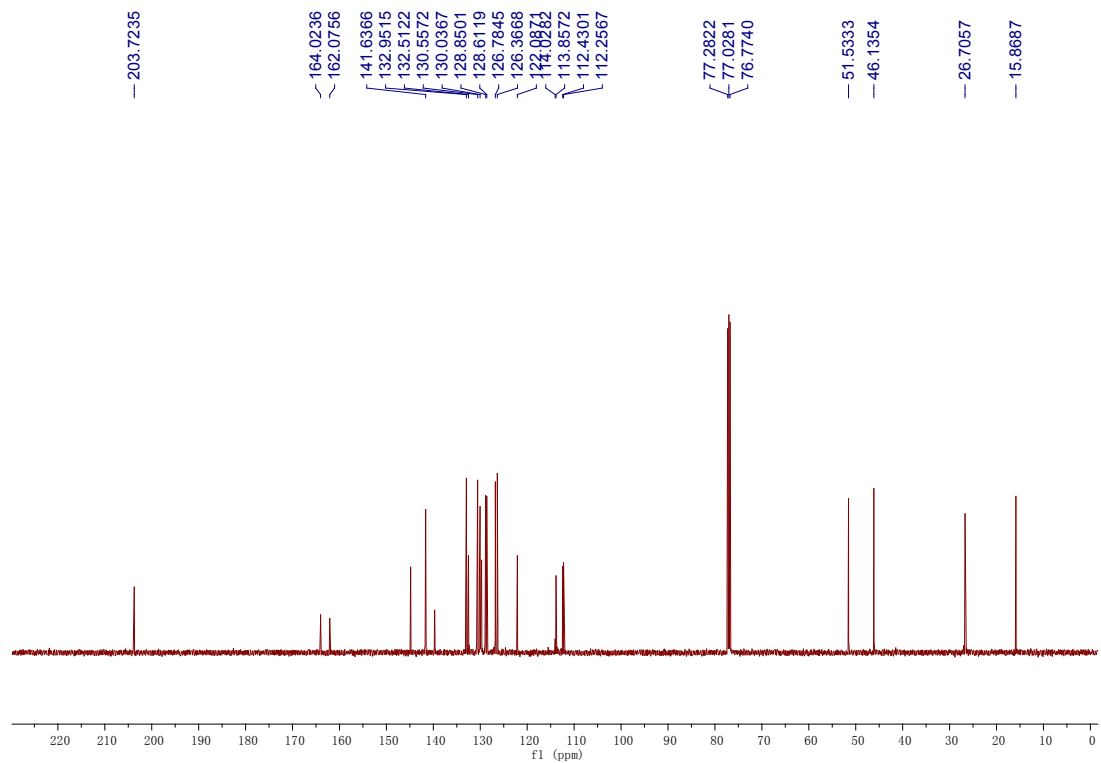

**1,3-dimethyl-1-((2E,4E)-5-(3-chlorophenyl)penta-2,4-dien-1-yl)naphthalen-2(1H)-one (5c)**



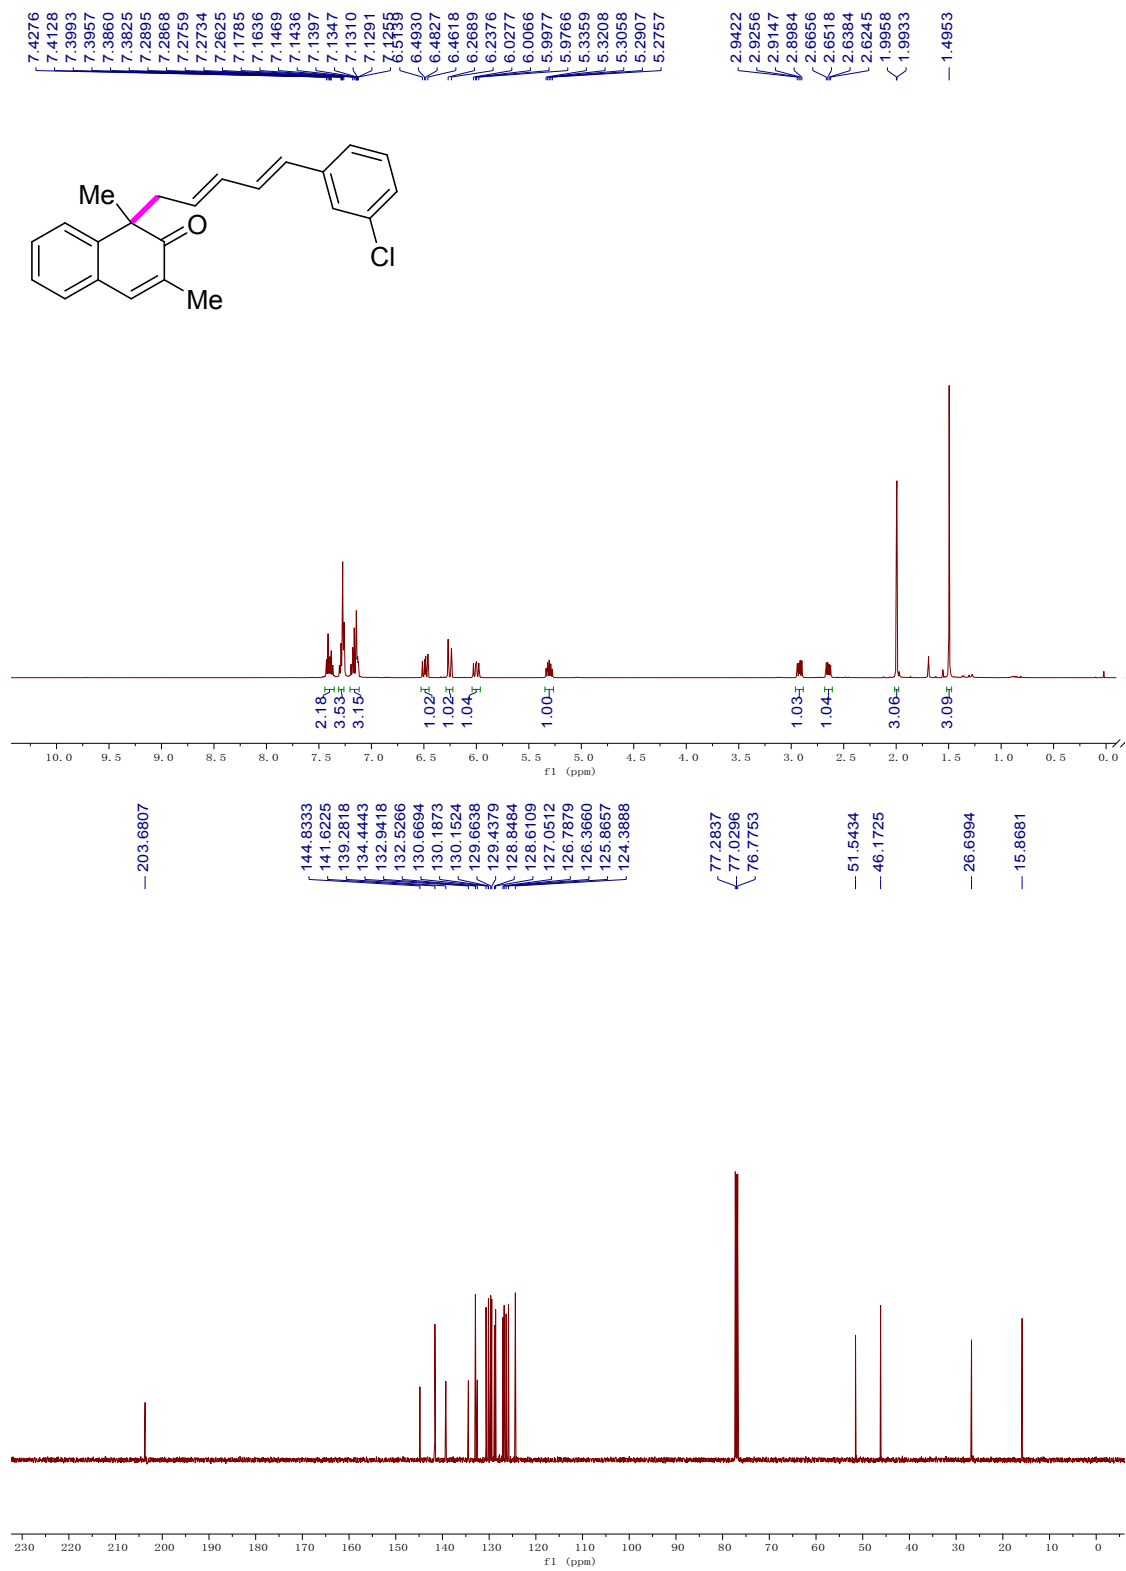

**1-((2E,4E)-5-(3-chlorophenyl)penta-2,4-dien-1-yl)-1-methylnaphthalen-2(1H)-one (5d)**

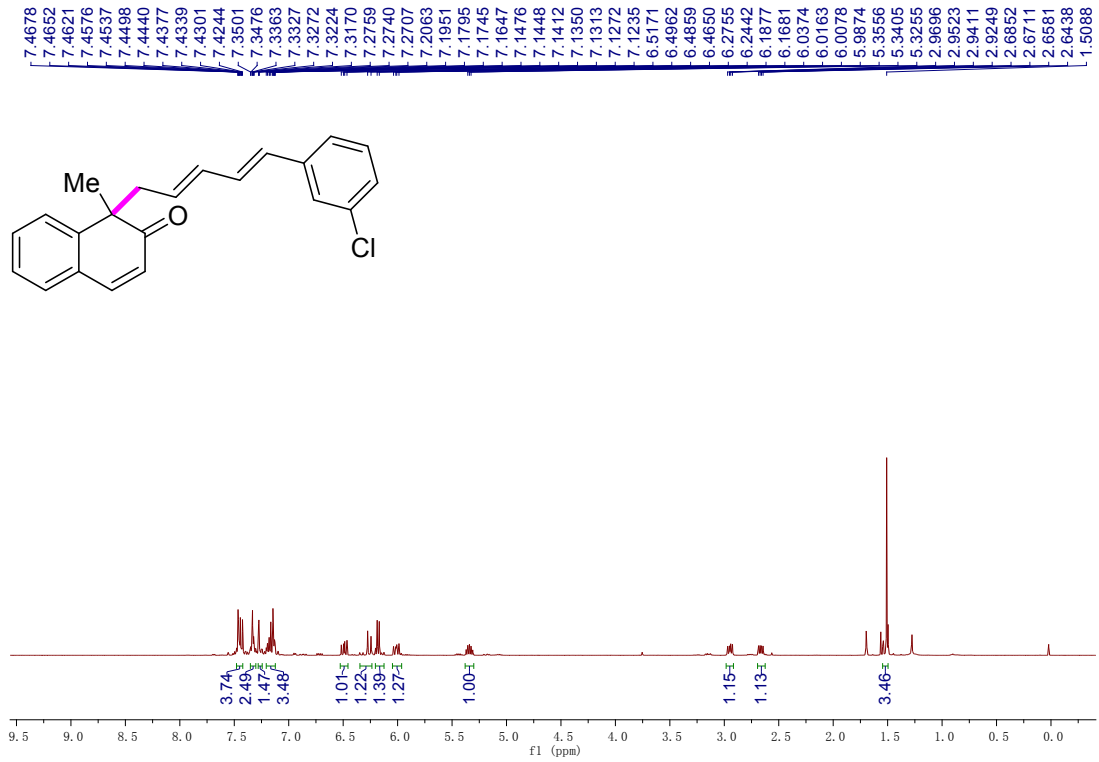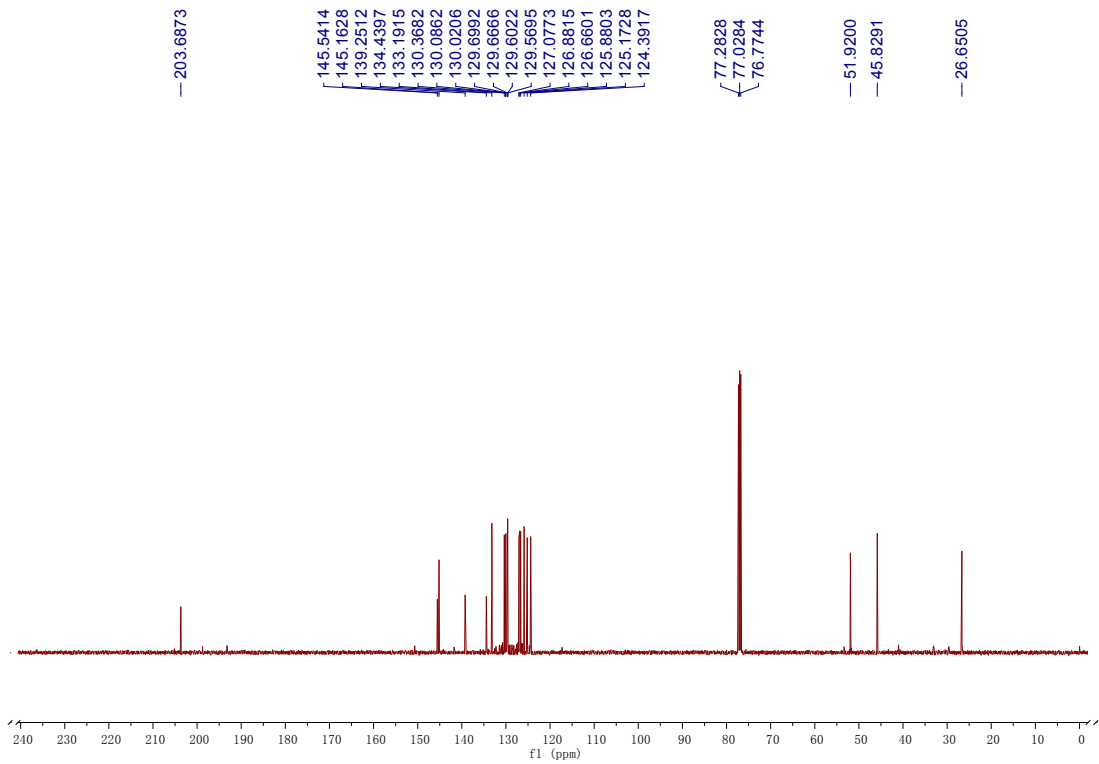

**3-ethyl-1-methyl-1-((2E,4E)-5-(3-chlorophenyl)-2,4-dien-1-yl)naphthalen-2(1H)-one (5e)**

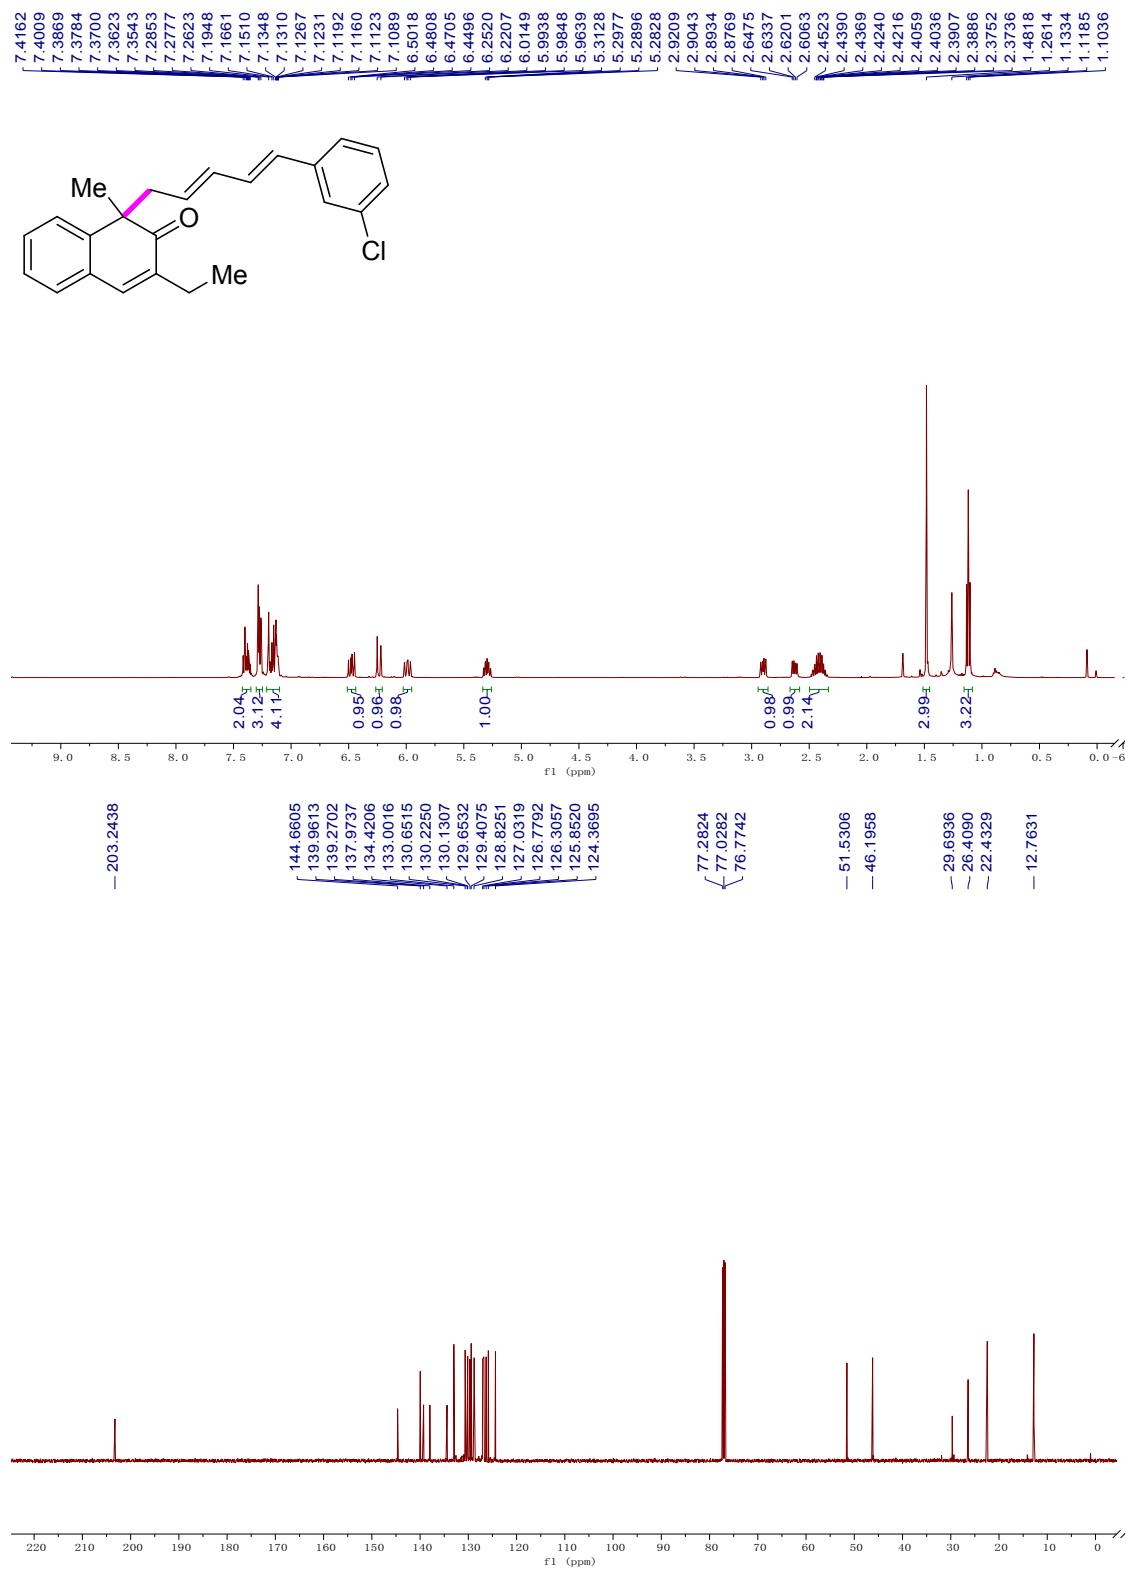

**4-((2E,4E)-5-(3-chlorophenyl)penta-2,4-dien-1-yl)-3,4,5-trimethoxycyclohexa-2,5-dienone (5g)**

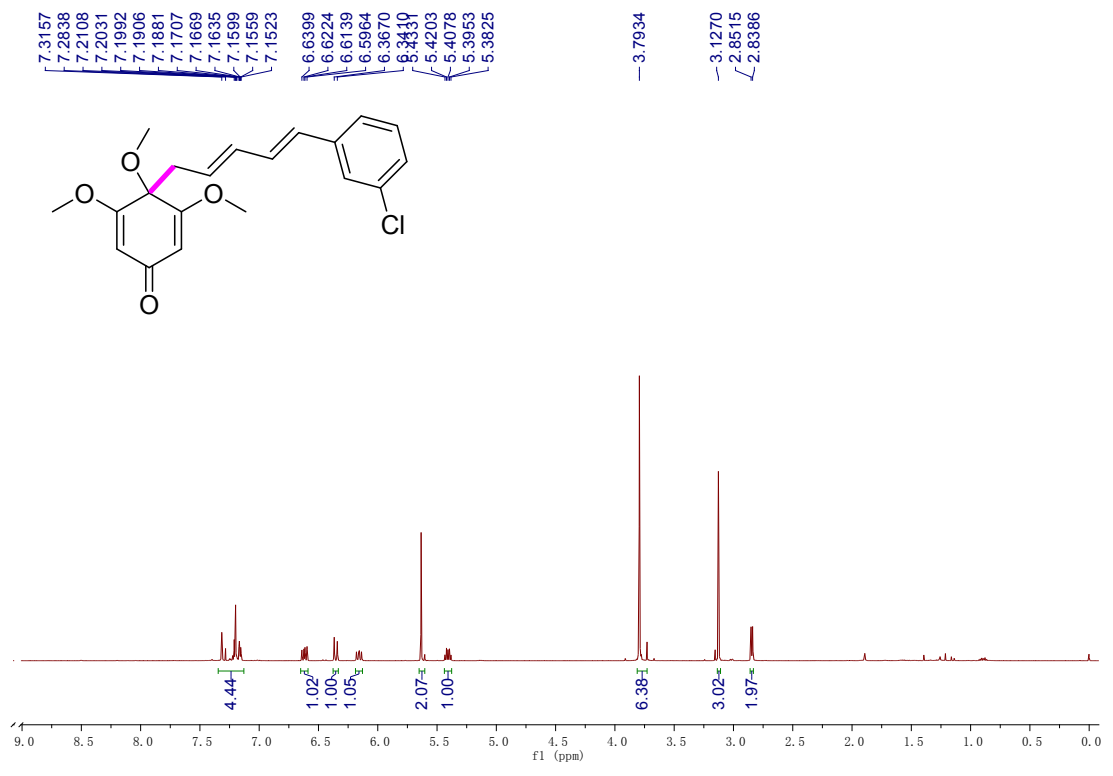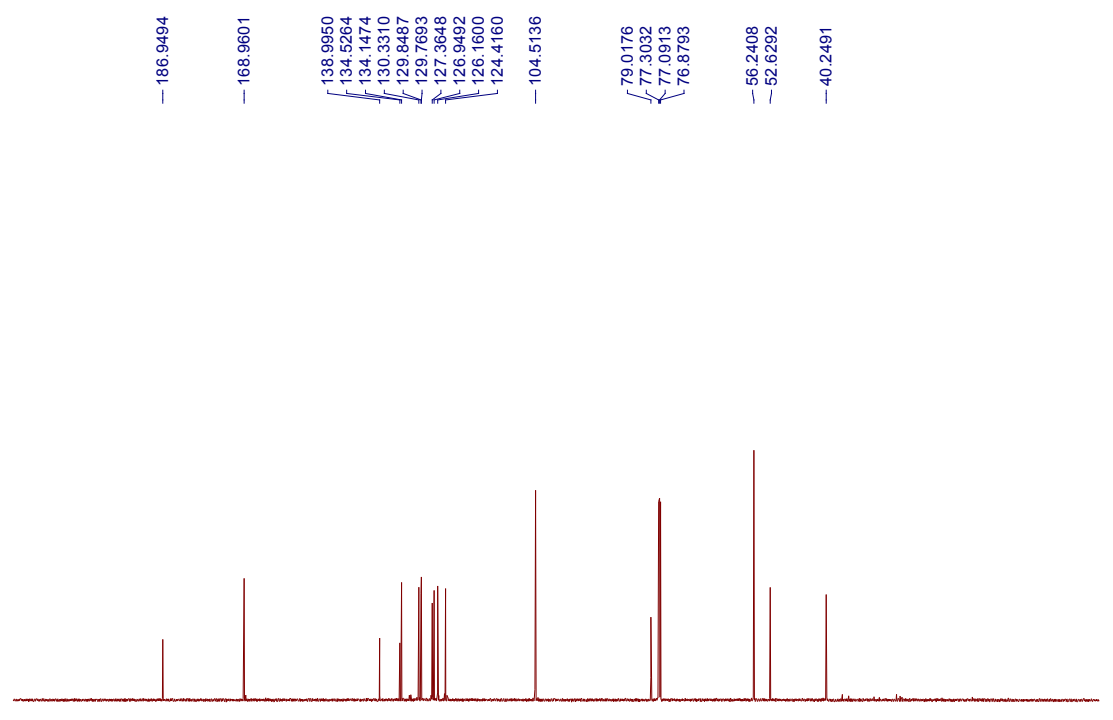

## 2,3-dimethyl-3-(5-phenylpentyl)-3H-indole (6)

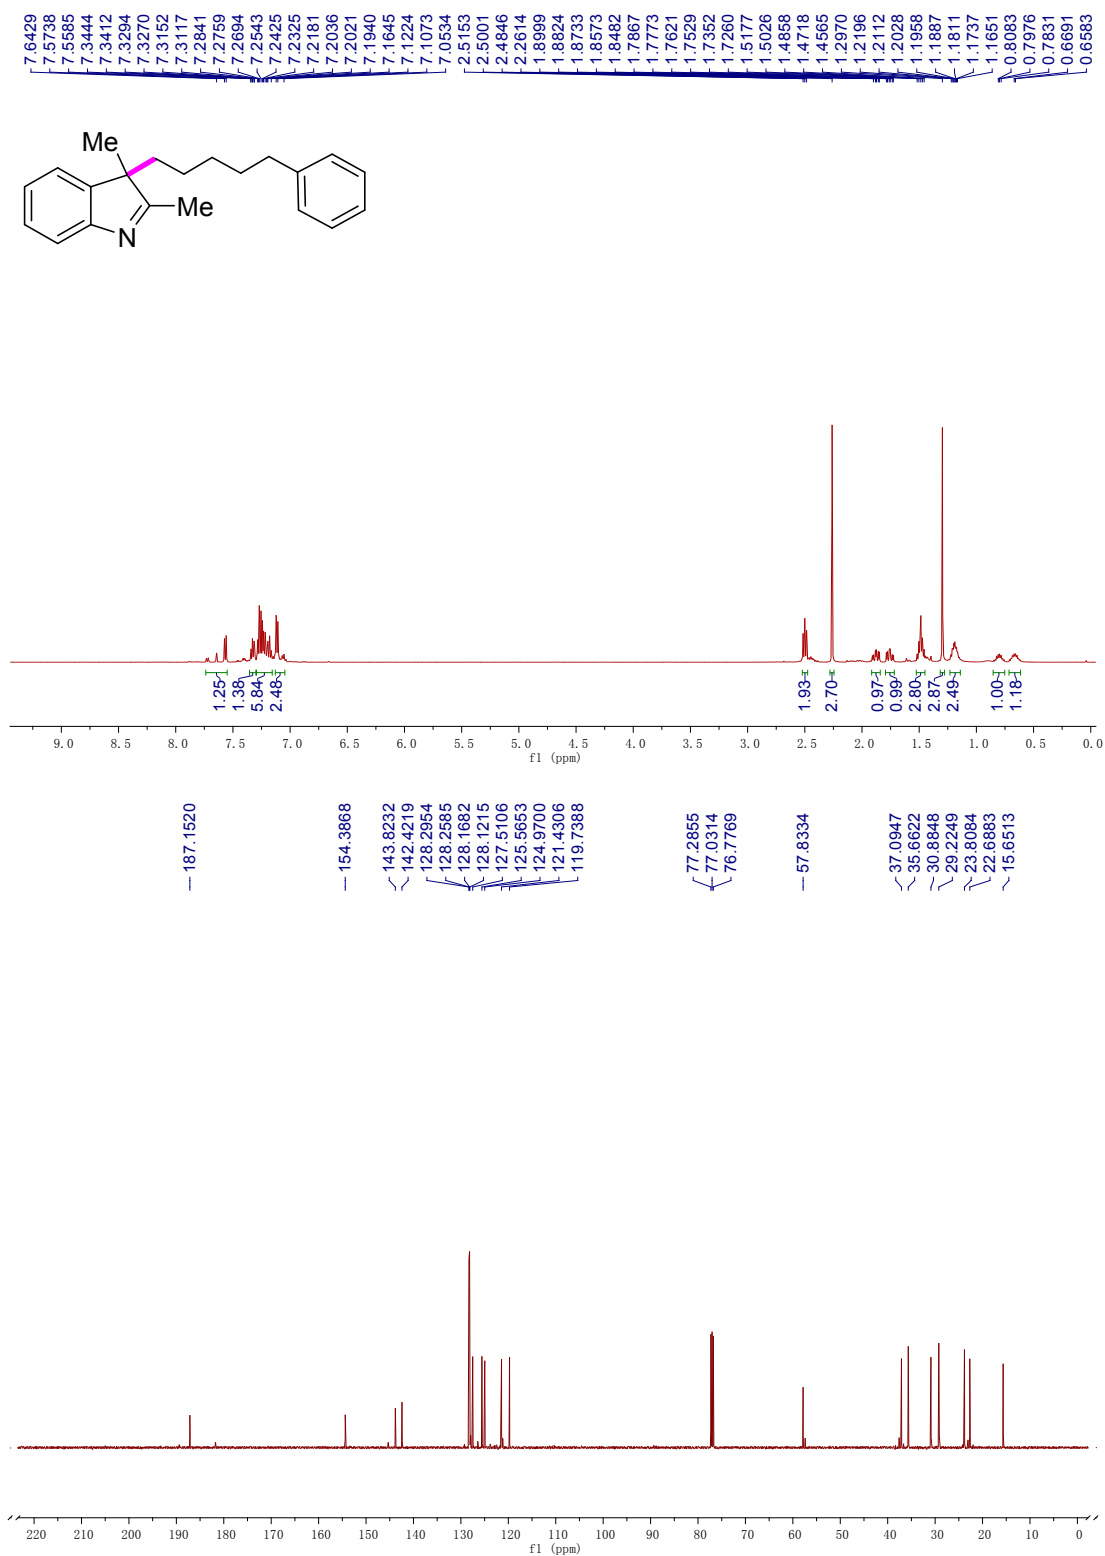

## (3a*S*,4*S*,7*R*,7a*R*)-2-benzyl-4-(((*R*)-2,3-dimethyl-3H-indol-3-yl)methyl)-7-phenyl-3a,4,7,7a-tetrahydro-1H-isoindole-1,3(2H)-dione (7a)

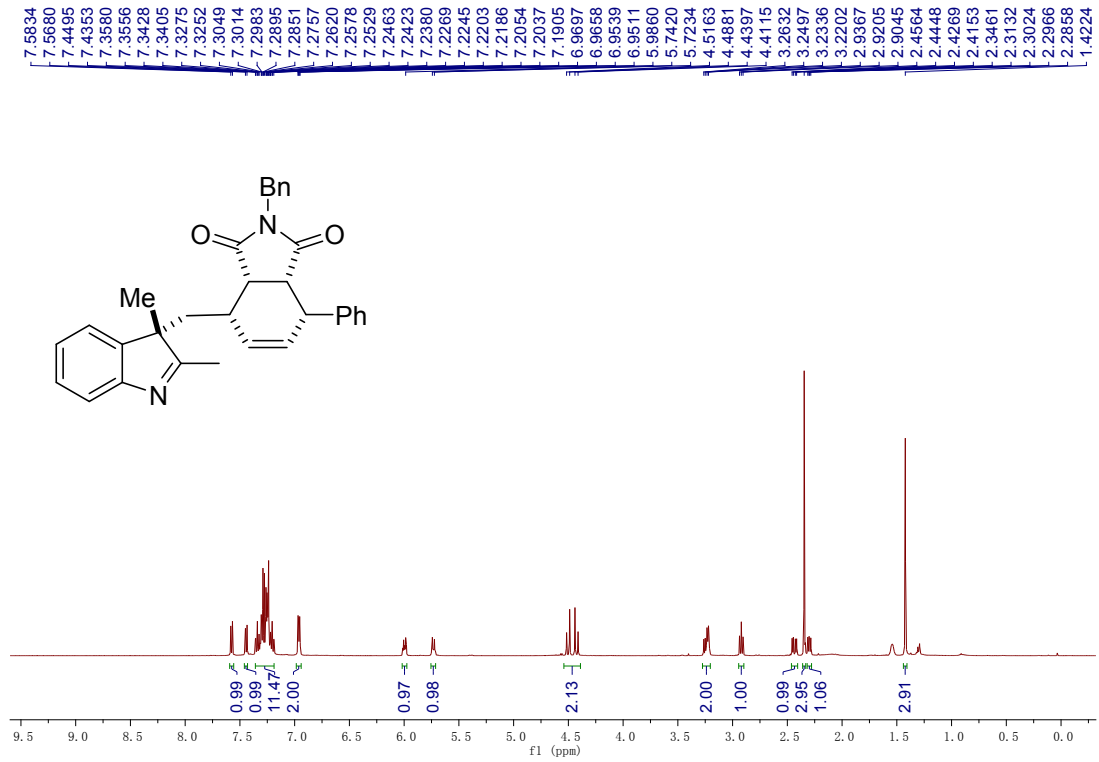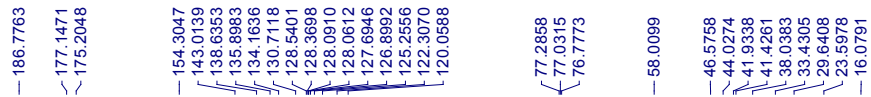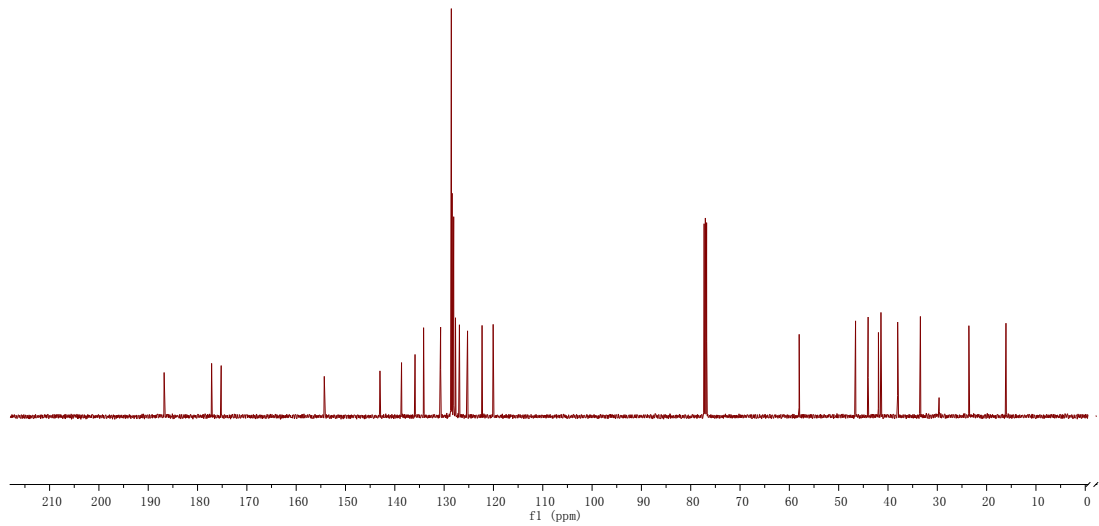

**(3*a**S*,4*S*,7*R*,7*a**R*)-2-benzyl-4-(((*S*)-2,3-dimethyl-3*H*-indol-3-yl)methyl)-7-phenyl-3*a*,4,7,7*a*-tetrahydro-1*H*-isoindole-1,3(2*H*)-dione (7*b*)**

7.5366  
7.5213  
7.3571  
7.3424  
7.3296  
7.3273  
7.3144  
7.3121  
7.3059  
7.2994  
7.2968  
7.2904  
7.2804  
7.2752  
7.2651  
7.2653  
7.2614  
7.2524  
7.2375  
7.2341  
7.2273  
7.2203  
7.2056  
7.2041  
6.9832  
6.9798  
6.9672  
6.9651  
5.7876  
5.7758  
5.7690  
5.3670  
5.3605  
5.3485  
4.5586  
4.5304  
4.4677  
4.4395  
3.2434  
3.2355  
3.2292  
3.1345  
3.1184  
3.1027  
2.8966  
2.8857  
2.8800  
2.8681  
2.8593  
2.8371  
2.8297  
2.6543  
2.6374  
2.6247  
2.6078  
2.3967  
1.4320

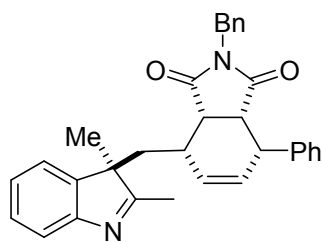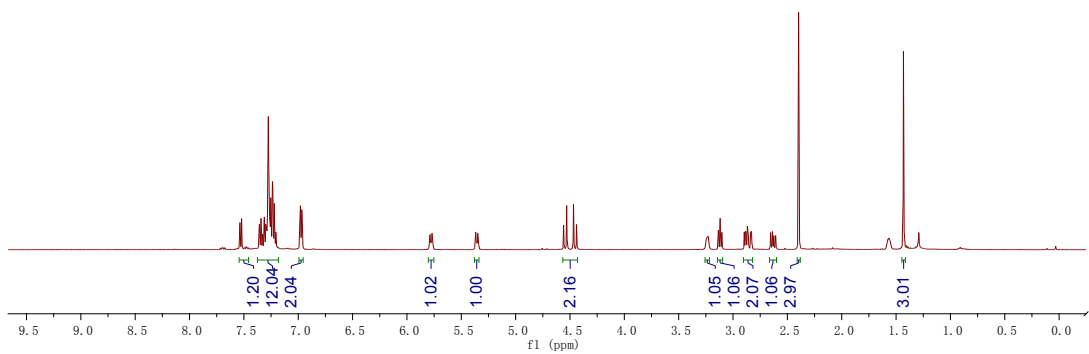

186.7365  
177.1627  
175.1792  
154.3493  
142.7113  
138.6083  
135.8119  
134.3005  
132.0670  
131.9884  
129.4244  
128.5745  
128.5225  
128.3708  
128.0321  
127.9577  
127.6993  
126.8508  
125.1325  
122.1570  
120.0856  
77.2859  
77.0315  
76.7770  
58.0810  
46.5226  
45.1875  
42.0200  
41.2327  
38.6674  
33.3338  
29.6191  
23.2387  
15.9961

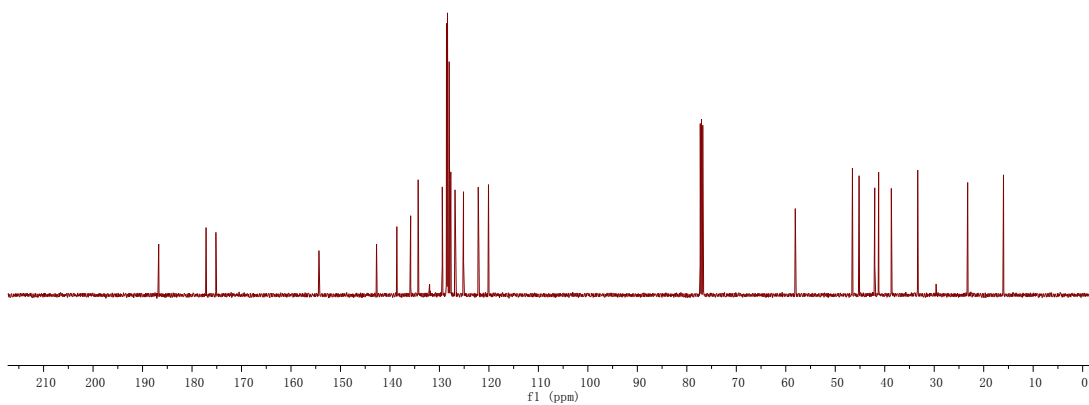

Supplement: d0ob02103b1.pdf [file d0ob02103b1.pdf]
